# Supplementary material for: Complex three-dimensional lanthanide metal–organic frameworks with variable coordination spheres based on pyrazine-2,3,5,6-tetracarboxylate
Source: Royal Society of Chemistry journal article supplement (doi:10.1039/c4ce02564d), 2015-01-01
Supplement: c4ce02564d1.pdf [file c4ce02564d1.pdf]

### Electronic Supplementary Information

#### Complex three-dimensional lanthanide metal-organic frameworks with variable coordination spheres based on pyrazine-2,3,5,6-tetracarboxylate

Conrad W. Ingram<sup>1\*</sup>, Geoffrey Kibakaya<sup>1</sup>, John Bacsá<sup>2</sup>, Stephan Mathis (II)<sup>1</sup>, Alvin A. Holder<sup>3</sup>, Varma H. Rambaran<sup>4</sup>, Brandon Dennis<sup>1</sup>, Esmeralda Castaneda<sup>1</sup>, Z. John Zhang<sup>5</sup> and Daniel Sabo<sup>5</sup>

<sup>1</sup>*Center for Functional Nanoscale Materials, Department of Chemistry, Clark Atlanta University, Atlanta, GA 30314, U.S.A.*

<sup>2</sup>*Department of Chemistry, Emory University, Atlanta, GA 30322, U.S.A.*

<sup>3</sup>*Department of Chemistry and Biochemistry, Old Dominion University, Norfolk, VA 23529, U.S.A.*

<sup>4</sup>*Biomedical Engineering, The University of Trinidad and Tobago, Lots 74-98, O'Meara Industrial Park, Arima, Trinidad, West Indies*

<sup>5</sup>*Department of Chemistry and Biochemistry, Georgia Institute of Technology, Atlanta, GA 30332, U.S.A.*

\*Corresponding author: *Tel.: +1 404-880-6898; E-mail address: [cingram@cau.edu](mailto:cingram@cau.edu)*

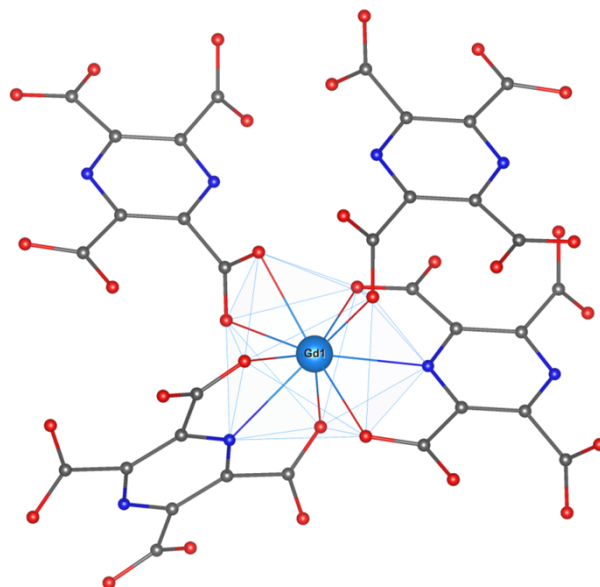

Fig. S1a.

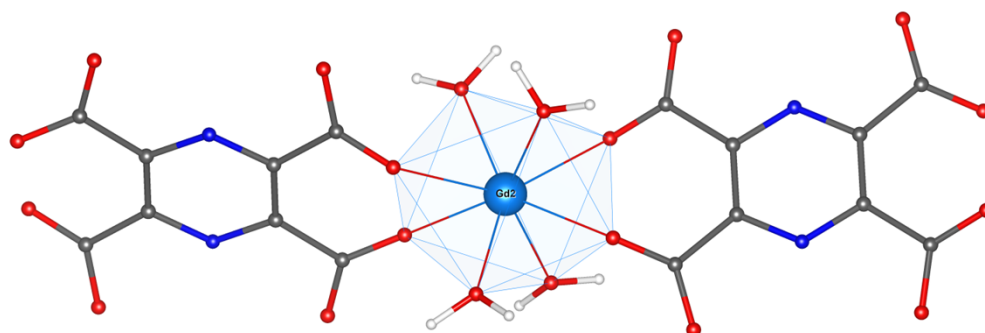

Fig. S1b.

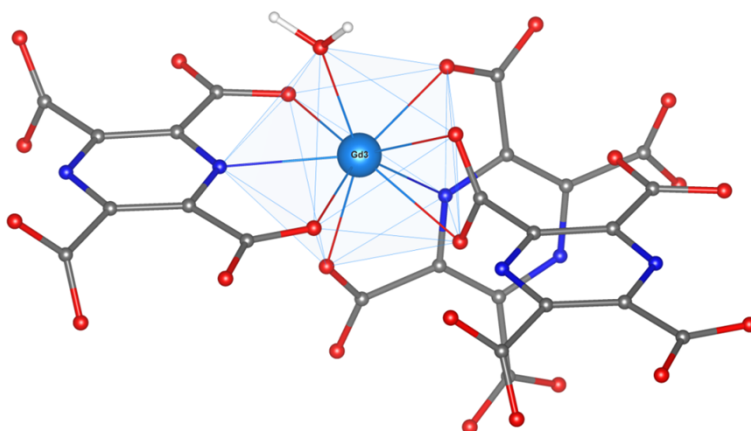

Fig. S1c.

Fig S1. Coordination environment of Gd1 (a), Gd2 (b), and Gd3 (c).  
(red = O, grey = C, blue = N)

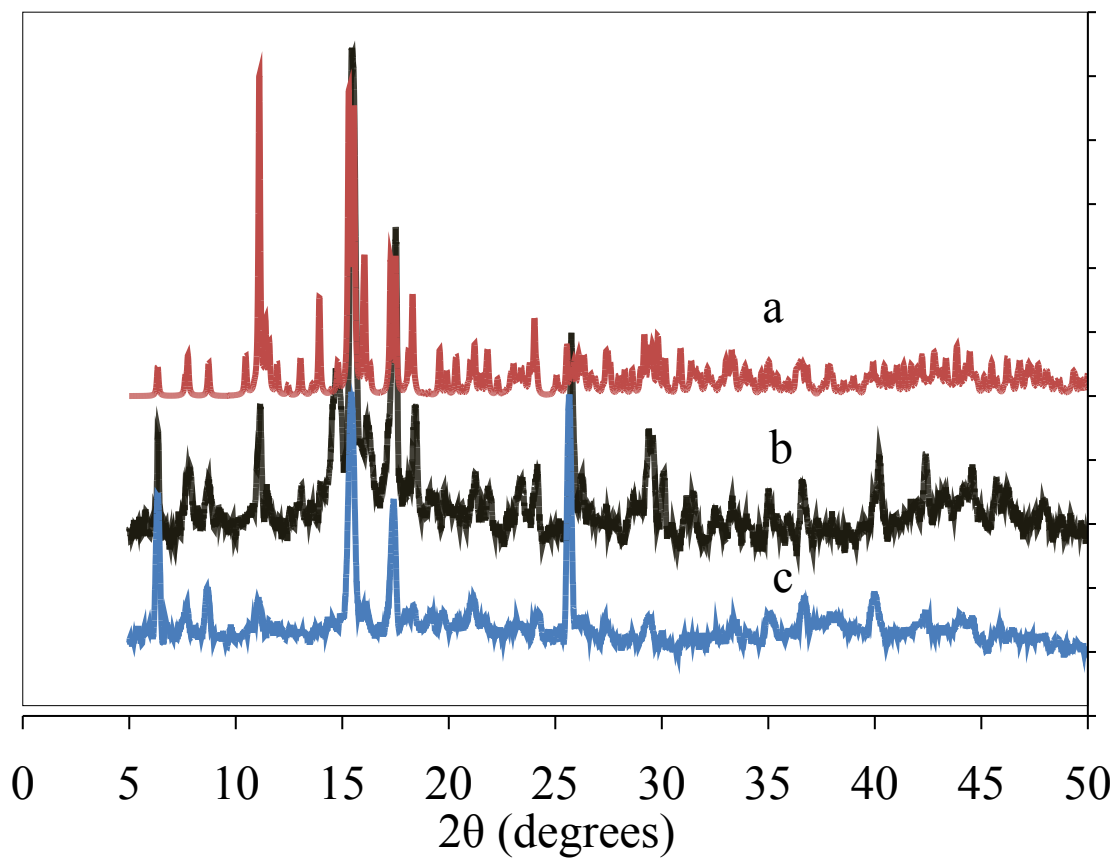

Fig. S2. Simulated (a) and measured powdered X-Ray diffraction pattern of “as synthesized” **1** (b) and **2** (c).

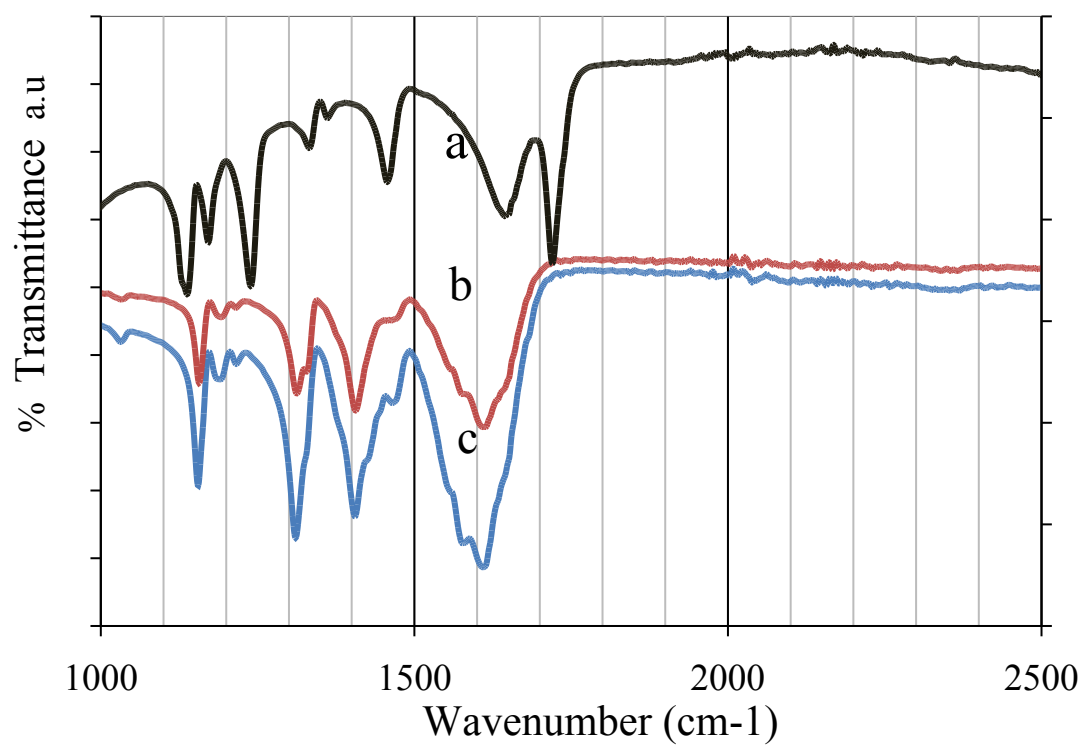

Fig. S3. FTIR spectra of H<sub>4</sub>pztc (a), **1** (b) and **2** (c).

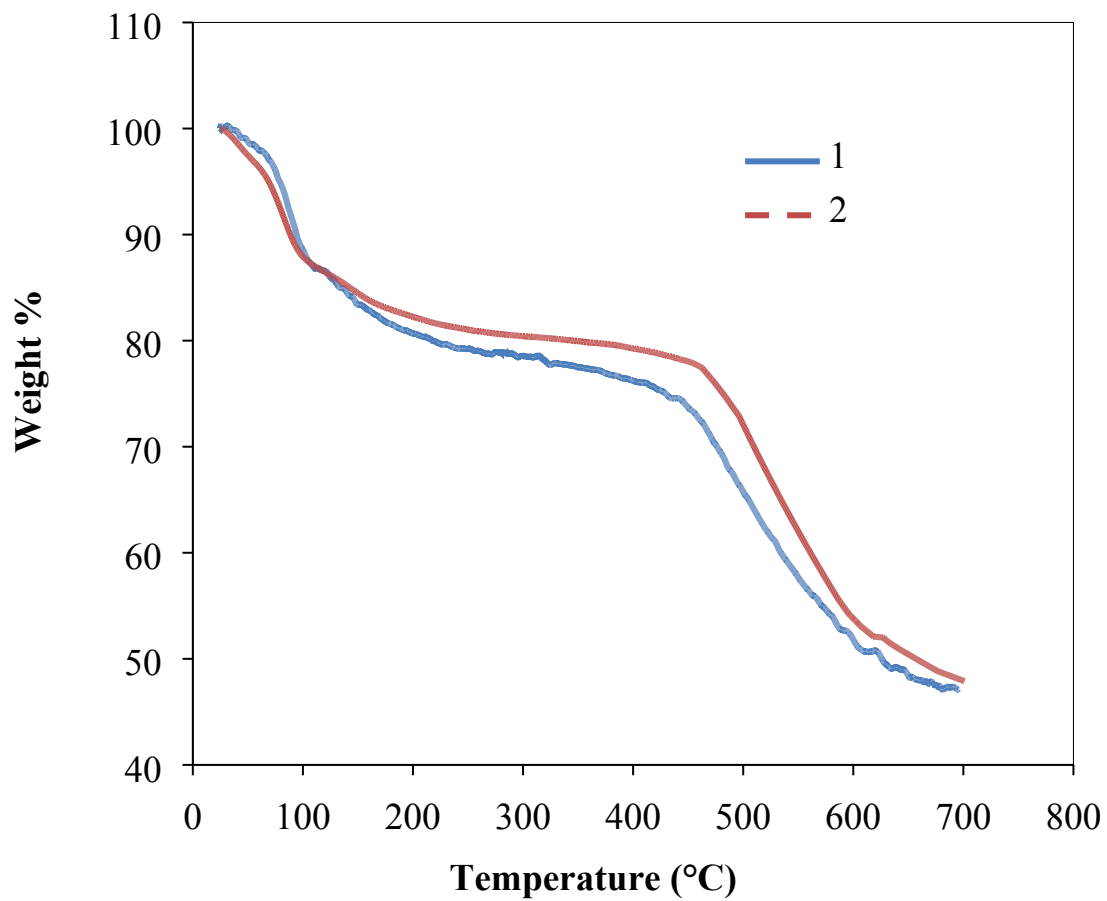

Fig. S4. Thermogravimetric curves of **1** and **2**.

Table S1. Crystal data and structure refinement for **1**.

|                                   |                                                                                |                   |
|-----------------------------------|--------------------------------------------------------------------------------|-------------------|
| Identification code               | <b>1</b>                                                                       |                   |
| Empirical formula                 | C <sub>24</sub> H <sub>42</sub> Gd <sub>4</sub> N <sub>6</sub> O <sub>45</sub> |                   |
| Formula weight                    | 1763.63                                                                        |                   |
| Temperature                       | 110(2) K                                                                       |                   |
| Wavelength                        | 0.71073 Å                                                                      |                   |
| Crystal system                    | Triclinic                                                                      |                   |
| Space group                       | P-1                                                                            |                   |
| Unit cell dimensions              | a = 8.5607(10) Å                                                               | α = 88.5392(17)°. |
|                                   | b = 14.1023(17) Å                                                              | β = 86.4998(15)°. |
|                                   | c = 20.294(2) Å                                                                | γ = 81.2519(16)°. |
| Volume                            | 2416.6(5) Å <sup>3</sup>                                                       |                   |
| Z                                 | 2                                                                              |                   |
| Density (calculated)              | 2.424 Mg/m <sup>3</sup>                                                        |                   |
| Absorption coefficient            | 5.552 mm <sup>-1</sup>                                                         |                   |
| F(000)                            | 1688                                                                           |                   |
| Crystal size                      | 0.394 x 0.146 x 0.108 mm <sup>3</sup>                                          |                   |
| Theta range for data collection   | 2.011 to 33.346°.                                                              |                   |
| Index ranges                      | -11 ≤ h ≤ 13, -21 ≤ k ≤ 21, -31 ≤ l ≤ 29                                       |                   |
| Reflections collected             | 24173                                                                          |                   |
| Independent reflections           | 17134 [R(int) = 0.0571]                                                        |                   |
| Completeness to theta = 26.000°   | 99.2 %                                                                         |                   |
| Absorption correction             | Semi-empirical from equivalents                                                |                   |
| Max. and min. transmission        | 1 and 0.4305                                                                   |                   |
| Refinement method                 | Full-matrix least-squares on F <sup>2</sup>                                    |                   |
| Data / restraints / parameters    | 17134 / 238 / 814                                                              |                   |
| Goodness-of-fit on F <sup>2</sup> | 1.056                                                                          |                   |
| Final R indices [I > 2σ(I)]       | R1 = 0.0570, wR2 = 0.1455                                                      |                   |
| R indices (all data)              | R1 = 0.0690, wR2 = 0.1516                                                      |                   |
| Extinction coefficient            | n/a                                                                            |                   |
| Largest diff. peak and hole       | 4.712 and -5.877 e.Å <sup>-3</sup>                                             |                   |

Table S2. Atomic coordinates ( $\times 10^4$ ) and equivalent isotropic displacement parameters ( $\text{\AA}^2 \times 10^3$ ) for **1**.  $U(\text{eq})$  is defined as one third of the trace of the orthogonalized  $U^{ij}$  tensor.

|       | x        | y        | z       | $U(\text{eq})$ |
|-------|----------|----------|---------|----------------|
| C(1)  | 12525(5) | 5883(3)  | 923(2)  | 9(1)           |
| C(2)  | 13873(4) | 5362(3)  | 473(2)  | 7(1)           |
| C(3)  | 14905(4) | 4508(3)  | 587(2)  | 8(1)           |
| C(4)  | 15043(5) | 3876(3)  | 1218(2) | 11(1)          |
| C(5)  | 11271(5) | 9327(3)  | 901(2)  | 11(1)          |
| C(6)  | 9776(4)  | 9105(3)  | 619(2)  | 9(1)           |
| C(7)  | 8216(5)  | 9566(3)  | 776(2)  | 9(1)           |
| C(8)  | 7238(5)  | 8484(3)  | 159(2)  | 9(1)           |
| C(9)  | 8754(5)  | 8038(3)  | -21(2)  | 9(1)           |
| C(10) | 9190(5)  | 7211(3)  | -498(2) | 13(1)          |
| C(11) | 7823(5)  | 10455(3) | 1189(2) | 11(1)          |
| C(12) | 5756(4)  | 8125(3)  | -28(2)  | 8(1)           |
| C(13) | 12063(5) | 5822(3)  | 4034(2) | 10(1)          |
| C(14) | 10915(4) | 5353(3)  | 4506(2) | 8(1)           |
| C(15) | 9825(4)  | 5452(3)  | 5590(2) | 8(1)           |
| C(16) | 9899(5)  | 5999(3)  | 6219(2) | 11(1)          |
| C(17) | 14927(5) | 10215(3) | 3521(2) | 12(1)          |
| C(18) | 14813(5) | 9452(3)  | 4064(2) | 11(1)          |
| C(19) | 13450(5) | 9054(3)  | 4270(2) | 9(1)           |
| C(20) | 14957(5) | 7991(3)  | 4964(2) | 10(1)          |
| C(21) | 16310(4) | 8406(3)  | 4743(2) | 7(1)           |
| C(22) | 17952(5) | 8044(3)  | 4970(2) | 11(1)          |
| C(23) | 14965(5) | 7173(3)  | 5447(2) | 9(1)           |
| C(24) | 11776(5) | 9331(3)  | 4056(2) | 10(1)          |
| N(2)  | 10714(4) | 5777(2)  | 5094(2) | 8(1)           |
| N(3)  | 13565(4) | 8335(2)  | 4718(2) | 7(1)           |
| N(5)  | 10006(4) | 8358(2)  | 221(2)  | 10(1)          |
| N(6)  | 6964(4)  | 9236(2)  | 556(2)  | 10(1)          |
| N(4)  | 16216(4) | 9137(3)  | 4316(2) | 12(1)          |
| O(1)  | 12156(4) | 6757(2)  | 792(2)  | 13(1)          |
| O(1W) | 10233(4) | 6153(2)  | 2634(2) | 20(1)          |

|        |          |          |         |       |
|--------|----------|----------|---------|-------|
| O(2)   | 11857(4) | 5426(2)  | 1363(1) | 12(1) |
| O(2W)  | 10935(4) | 3794(2)  | 1963(2) | 24(1) |
| N(1)   | 14006(4) | 5826(2)  | -109(2) | 9(1)  |
| O(3W)  | 13948(4) | 6062(2)  | 2322(2) | 19(1) |
| O(3)   | 14383(4) | 4198(2)  | 1746(2) | 16(1) |
| O(4W)  | 13606(5) | 3473(3)  | 3022(2) | 25(1) |
| O(4)   | 15868(4) | 3067(2)  | 1147(2) | 14(1) |
| O(5W)  | 13451(4) | 11496(2) | 1742(2) | 21(1) |
| O(5)   | 10650(3) | 6882(2)  | -573(2) | 12(1) |
| O(6W)  | 10295(4) | 11624(2) | 1941(2) | 22(1) |
| O(6)   | 8089(4)  | 6951(2)  | -788(2) | 17(1) |
| O(7W)  | 11954(4) | 11726(2) | 3095(1) | 16(1) |
| O(7)   | 12549(3) | 8912(2)  | 638(2)  | 13(1) |
| O(8W)  | 14387(4) | 9450(2)  | 1710(2) | 18(1) |
| O(8)   | 11098(4) | 9893(2)  | 1378(2) | 14(1) |
| O(9W)  | 11438(3) | 8825(2)  | 5909(2) | 14(1) |
| O(9)   | 5306(3)  | 7443(2)  | 304(2)  | 12(1) |
| O(10)  | 4975(4)  | 8557(2)  | -485(2) | 13(1) |
| O(11)  | 8301(4)  | 11210(2) | 955(1)  | 11(1) |
| O(12)  | 7021(4)  | 10390(2) | 1716(2) | 17(1) |
| O(13)  | 12785(4) | 5362(2)  | 3570(1) | 12(1) |
| O(14)  | 12246(3) | 6660(2)  | 4185(2) | 12(1) |
| O(15)  | 10332(4) | 6811(2)  | 6135(1) | 13(1) |
| O(16)  | 9621(4)  | 5603(2)  | 6762(2) | 18(1) |
| O(17)  | 14455(4) | 10039(2) | 2974(2) | 16(1) |
| O(18)  | 15576(4) | 10920(2) | 3660(2) | 17(1) |
| O(20)  | 11493(3) | 10005(2) | 3636(1) | 12(1) |
| O(20W) | 12232(4) | 8605(2)  | 2572(2) | 18(1) |
| O(19)  | 10767(4) | 8865(2)  | 4328(2) | 14(1) |
| O(21W) | 9392(3)  | 10053(2) | 2684(1) | 19(1) |
| O(21)  | 13618(4) | 6906(2)  | 5586(2) | 13(1) |
| O(22)  | 16244(4) | 6812(2)  | 5668(2) | 14(1) |
| O(23)  | 18457(4) | 8405(2)  | 5445(2) | 14(1) |
| O(24)  | 18761(4) | 7411(2)  | 4599(2) | 14(1) |
| Gd(1)  | 12750(1) | 7629(1)  | -190(1) | 7(1)  |
| Gd(2)  | 12317(1) | 4858(1)  | 2477(1) | 9(1)  |



|        |          |          |         |       |
|--------|----------|----------|---------|-------|
| Gd(3)  | 11190(1) | 7596(1)  | 5143(1) | 7(1)  |
| Gd(4)  | 12116(1) | 10302(1) | 2415(1) | 10(1) |
| O(15W) | 6252(4)  | 6352(3)  | 1397(2) | 20(1) |
| O(10W) | 14451(4) | 7300(2)  | 3263(2) | 17(1) |
| O(16W) | 10307(4) | 7698(2)  | 1839(2) | 20(1) |
| O(13W) | 8918(6)  | 8370(3)  | 3171(2) | 35(1) |
| O(19W) | 15935(5) | 2141(3)  | 2606(2) | 23(1) |
| O(17W) | 8736(5)  | 5111(3)  | 913(2)  | 32(1) |
| O(18W) | 8518(5)  | 3015(3)  | 2606(2) | 27(1) |
| O(14W) | 7073(5)  | 7911(3)  | 2084(2) | 33(1) |
| O(12W) | 7640(4)  | 6473(2)  | 3560(2) | 19(1) |
| O(11W) | 16144(5) | 4975(3)  | 3886(3) | 48(1) |

---

Table S3. Bond lengths [ $\text{\AA}$ ] and angles [ $^\circ$ ] for **1**.

---

|               |          |
|---------------|----------|
| C(1)-C(2)     | 1.534(5) |
| C(1)-O(1)     | 1.252(5) |
| C(1)-O(2)     | 1.249(5) |
| C(2)-C(3)     | 1.405(5) |
| C(2)-N(1)     | 1.342(5) |
| C(3)-C(4)     | 1.541(5) |
| C(3)-N(1)#1   | 1.346(5) |
| C(4)-O(3)     | 1.244(5) |
| C(4)-O(4)     | 1.254(5) |
| C(5)-C(6)     | 1.512(6) |
| C(5)-O(7)     | 1.255(5) |
| C(5)-O(8)     | 1.257(5) |
| C(6)-C(7)     | 1.415(5) |
| C(6)-N(5)     | 1.327(5) |
| C(7)-C(11)    | 1.509(5) |
| C(7)-N(6)     | 1.336(5) |
| C(8)-C(9)     | 1.385(5) |
| C(8)-C(12)    | 1.508(6) |
| C(8)-N(6)     | 1.331(5) |
| C(9)-C(10)    | 1.522(6) |
| C(9)-N(5)     | 1.348(5) |
| C(10)-O(5)    | 1.266(5) |
| C(10)-O(6)    | 1.247(5) |
| C(11)-O(11)   | 1.269(5) |
| C(11)-O(12)   | 1.244(5) |
| C(12)-O(9)    | 1.255(5) |
| C(12)-O(10)   | 1.265(5) |
| C(12)-Gd(1)#2 | 2.807(4) |
| C(13)-C(14)   | 1.540(5) |
| C(13)-O(13)   | 1.237(5) |
| C(13)-O(14)   | 1.262(5) |
| C(14)-C(15)#3 | 1.405(5) |
| C(14)-N(2)    | 1.337(5) |
| C(15)-C(14)#3 | 1.405(5) |

|               |           |
|---------------|-----------|
| C(15)-C(16)   | 1.518(5)  |
| C(15)-N(2)    | 1.340(5)  |
| C(16)-O(15)   | 1.260(5)  |
| C(16)-O(16)   | 1.248(5)  |
| C(17)-C(18)   | 1.529(6)  |
| C(17)-O(17)   | 1.247(5)  |
| C(17)-O(18)   | 1.256(5)  |
| C(18)-C(19)   | 1.407(6)  |
| C(18)-N(4)    | 1.342(5)  |
| C(19)-C(24)   | 1.513(6)  |
| C(19)-N(3)    | 1.342(5)  |
| C(20)-C(21)   | 1.419(5)  |
| C(20)-C(23)   | 1.495(6)  |
| C(20)-N(3)    | 1.337(5)  |
| C(21)-C(22)   | 1.516(5)  |
| C(21)-N(4)    | 1.325(5)  |
| C(22)-O(23)   | 1.233(5)  |
| C(22)-O(24)   | 1.275(5)  |
| C(22)-Gd(3)#4 | 2.789(4)  |
| C(23)-O(21)   | 1.280(5)  |
| C(23)-O(22)   | 1.241(5)  |
| C(24)-O(20)   | 1.266(5)  |
| C(24)-O(19)   | 1.257(5)  |
| N(2)-Gd(3)    | 2.662(3)  |
| N(3)-Gd(3)    | 2.520(3)  |
| N(5)-Gd(1)    | 2.519(3)  |
| O(1)-Gd(1)    | 2.385(3)  |
| O(1W)-H(1WA)  | 1.007(7)  |
| O(1W)-H(1WB)  | 0.985(7)  |
| O(1W)-Gd(2)   | 2.364(3)  |
| O(2)-Gd(2)    | 2.413(3)  |
| O(2W)-H(2WA)  | 0.984(8)  |
| O(2W)-H(2WB)  | 0.987(13) |
| O(2W)-Gd(2)   | 2.347(3)  |
| N(1)-C(3)#1   | 1.346(5)  |
| N(1)-Gd(1)    | 2.611(3)  |

|               |          |
|---------------|----------|
| O(3W)-H(3WA)  | 0.992(7) |
| O(3W)-H(3WB)  | 0.985(8) |
| O(3W)-Gd(2)   | 2.360(3) |
| O(3)-Gd(2)    | 2.332(3) |
| O(4W)-H(4WA)  | 0.981(7) |
| O(4W)-H(4WB)  | 0.986(7) |
| O(4W)-Gd(2)   | 2.375(3) |
| O(4)-Gd(1)#1  | 2.366(3) |
| O(5W)-H(5WA)  | 1.008(7) |
| O(5W)-H(5WB)  | 1.011(4) |
| O(5W)-Gd(4)   | 2.507(3) |
| O(5)-Gd(1)    | 2.395(3) |
| O(6W)-H(6WA)  | 0.996(7) |
| O(6W)-H(6WB)  | 0.984(7) |
| O(6W)-Gd(4)   | 2.458(3) |
| O(7W)-H(7WA)  | 1.013(7) |
| O(7W)-H(7WB)  | 1.003(6) |
| O(7W)-Gd(4)   | 2.447(3) |
| O(7)-Gd(1)    | 2.482(3) |
| O(8W)-H(8WA)  | 0.997(7) |
| O(8W)-H(8WB)  | 0.984(8) |
| O(8W)-Gd(4)   | 2.512(3) |
| O(8)-Gd(4)    | 2.441(3) |
| O(9W)-H(9WA)  | 0.986(8) |
| O(9W)-H(9WB)  | 0.990(4) |
| O(9W)-Gd(3)   | 2.400(3) |
| O(9)-Gd(1)#2  | 2.437(3) |
| O(10)-Gd(1)#2 | 2.506(3) |
| O(11)-Gd(1)#5 | 2.344(3) |
| O(13)-Gd(2)   | 2.421(3) |
| O(14)-Gd(3)   | 2.427(3) |
| O(15)-Gd(3)   | 2.403(3) |
| O(16)-Gd(2)#3 | 2.351(3) |
| O(17)-Gd(4)   | 2.339(3) |
| O(20)-Gd(4)   | 2.541(3) |
| O(20W)-H(20A) | 0.8500   |

|               |          |
|---------------|----------|
| O(20W)-H(20B) | 0.8520   |
| O(20W)-Gd(4)  | 2.393(3) |
| O(19)-Gd(3)   | 2.407(3) |
| O(21W)-H(21A) | 0.975(4) |
| O(21W)-H(21B) | 0.975(4) |
| O(21W)-Gd(4)  | 2.437(3) |
| O(21)-Gd(3)   | 2.376(3) |
| O(23)-Gd(3)#4 | 2.490(3) |
| O(24)-Gd(3)#4 | 2.464(3) |
| Gd(1)-O(4)#1  | 2.366(3) |
| Gd(1)-O(9)#4  | 2.437(3) |
| Gd(1)-O(10)#4 | 2.506(3) |
| Gd(1)-O(11)#5 | 2.344(3) |
| Gd(2)-O(16)#3 | 2.351(3) |
| Gd(3)-O(23)#2 | 2.490(3) |
| Gd(3)-O(24)#2 | 2.464(3) |
| O(15W)-H(15A) | 0.8484   |
| O(15W)-H(15B) | 0.8493   |
| O(10W)-H(10A) | 0.986(7) |
| O(10W)-H(10B) | 1.005(7) |
| O(16W)-H(16A) | 0.8456   |
| O(16W)-H(16B) | 0.8501   |
| O(13W)-H(13A) | 0.8643   |
| O(13W)-H(13B) | 0.9018   |
| O(19W)-H(19A) | 0.8494   |
| O(19W)-H(19B) | 0.8492   |
| O(17W)-H(17A) | 0.8474   |
| O(17W)-H(17B) | 0.8494   |
| O(18W)-H(18A) | 0.8489   |
| O(18W)-H(18B) | 0.8494   |
| O(14W)-H(14A) | 0.8500   |
| O(14W)-H(14B) | 0.8492   |
| O(12W)-H(12A) | 0.984(6) |
| O(12W)-H(12B) | 0.985(8) |
| O(11W)-H(11A) | 1.000(7) |
| O(11W)-H(11B) | 0.983(7) |

|                    |          |
|--------------------|----------|
| O(1)-C(1)-C(2)     | 114.7(3) |
| O(2)-C(1)-C(2)     | 120.1(3) |
| O(2)-C(1)-O(1)     | 125.2(4) |
| C(3)-C(2)-C(1)     | 129.5(3) |
| N(1)-C(2)-C(1)     | 111.4(3) |
| N(1)-C(2)-C(3)     | 119.1(3) |
| C(2)-C(3)-C(4)     | 129.0(3) |
| N(1)#1-C(3)-C(2)   | 119.1(3) |
| N(1)#1-C(3)-C(4)   | 111.9(3) |
| O(3)-C(4)-C(3)     | 119.3(3) |
| O(3)-C(4)-O(4)     | 125.5(4) |
| O(4)-C(4)-C(3)     | 115.2(3) |
| O(7)-C(5)-C(6)     | 116.1(3) |
| O(7)-C(5)-O(8)     | 127.2(4) |
| O(8)-C(5)-C(6)     | 116.7(3) |
| C(7)-C(6)-C(5)     | 126.4(3) |
| N(5)-C(6)-C(5)     | 113.9(3) |
| N(5)-C(6)-C(7)     | 119.5(4) |
| C(6)-C(7)-C(11)    | 124.0(4) |
| N(6)-C(7)-C(6)     | 121.2(3) |
| N(6)-C(7)-C(11)    | 114.9(3) |
| C(9)-C(8)-C(12)    | 123.7(3) |
| N(6)-C(8)-C(9)     | 122.4(4) |
| N(6)-C(8)-C(12)    | 113.8(3) |
| C(8)-C(9)-C(10)    | 126.3(4) |
| N(5)-C(9)-C(8)     | 119.4(3) |
| N(5)-C(9)-C(10)    | 114.3(3) |
| O(5)-C(10)-C(9)    | 116.0(4) |
| O(6)-C(10)-C(9)    | 117.0(3) |
| O(6)-C(10)-O(5)    | 126.9(4) |
| O(11)-C(11)-C(7)   | 116.7(3) |
| O(12)-C(11)-C(7)   | 117.3(4) |
| O(12)-C(11)-O(11)  | 126.0(4) |
| C(8)-C(12)-Gd(1)#2 | 170.3(3) |
| O(9)-C(12)-C(8)    | 118.1(3) |

|                     |          |
|---------------------|----------|
| O(9)-C(12)-O(10)    | 122.9(4) |
| O(9)-C(12)-Gd(1)#2  | 60.1(2)  |
| O(10)-C(12)-C(8)    | 118.8(3) |
| O(10)-C(12)-Gd(1)#2 | 63.2(2)  |
| O(13)-C(13)-C(14)   | 120.0(4) |
| O(13)-C(13)-O(14)   | 124.9(4) |
| O(14)-C(13)-C(14)   | 115.0(3) |
| C(15)#3-C(14)-C(13) | 129.3(3) |
| N(2)-C(14)-C(13)    | 111.5(3) |
| N(2)-C(14)-C(15)#3  | 119.1(3) |
| C(14)#3-C(15)-C(16) | 129.0(3) |
| N(2)-C(15)-C(14)#3  | 119.4(3) |
| N(2)-C(15)-C(16)    | 111.4(3) |
| O(15)-C(16)-C(15)   | 114.9(3) |
| O(16)-C(16)-C(15)   | 118.9(4) |
| O(16)-C(16)-O(15)   | 126.1(4) |
| O(17)-C(17)-C(18)   | 116.3(4) |
| O(17)-C(17)-O(18)   | 126.9(4) |
| O(18)-C(17)-C(18)   | 116.7(4) |
| C(19)-C(18)-C(17)   | 126.1(4) |
| N(4)-C(18)-C(17)    | 112.5(4) |
| N(4)-C(18)-C(19)    | 121.3(4) |
| C(18)-C(19)-C(24)   | 128.7(4) |
| N(3)-C(19)-C(18)    | 119.1(3) |
| N(3)-C(19)-C(24)    | 112.2(3) |
| C(21)-C(20)-C(23)   | 124.9(3) |
| N(3)-C(20)-C(21)    | 118.7(3) |
| N(3)-C(20)-C(23)    | 116.5(3) |
| C(20)-C(21)-C(22)   | 122.8(3) |
| N(4)-C(21)-C(20)    | 121.7(3) |
| N(4)-C(21)-C(22)    | 115.5(3) |
| C(21)-C(22)-Gd(3)#4 | 167.4(3) |
| O(23)-C(22)-C(21)   | 120.7(3) |
| O(23)-C(22)-O(24)   | 124.8(4) |
| O(23)-C(22)-Gd(3)#4 | 63.2(2)  |
| O(24)-C(22)-C(21)   | 114.3(4) |

|                     |           |
|---------------------|-----------|
| O(24)-C(22)-Gd(3)#4 | 62.0(2)   |
| O(21)-C(23)-C(20)   | 115.4(3)  |
| O(22)-C(23)-C(20)   | 118.4(4)  |
| O(22)-C(23)-O(21)   | 126.2(4)  |
| O(20)-C(24)-C(19)   | 119.0(4)  |
| O(19)-C(24)-C(19)   | 115.6(3)  |
| O(19)-C(24)-O(20)   | 125.4(4)  |
| C(14)-N(2)-C(15)    | 121.5(3)  |
| C(14)-N(2)-Gd(3)    | 117.8(3)  |
| C(15)-N(2)-Gd(3)    | 117.1(2)  |
| C(19)-N(3)-Gd(3)    | 121.9(3)  |
| C(20)-N(3)-C(19)    | 120.7(3)  |
| C(20)-N(3)-Gd(3)    | 117.4(3)  |
| C(6)-N(5)-C(9)      | 119.8(3)  |
| C(6)-N(5)-Gd(1)     | 121.2(3)  |
| C(9)-N(5)-Gd(1)     | 118.7(2)  |
| C(8)-N(6)-C(7)      | 117.7(3)  |
| C(21)-N(4)-C(18)    | 118.4(4)  |
| C(1)-O(1)-Gd(1)     | 129.0(2)  |
| H(1WA)-O(1W)-H(1WB) | 102.2(9)  |
| Gd(2)-O(1W)-H(1WA)  | 134.6(8)  |
| Gd(2)-O(1W)-H(1WB)  | 122.6(8)  |
| C(1)-O(2)-Gd(2)     | 137.7(3)  |
| H(2WA)-O(2W)-H(2WB) | 103.6(13) |
| Gd(2)-O(2W)-H(2WA)  | 124.7(9)  |
| Gd(2)-O(2W)-H(2WB)  | 131.7(12) |
| C(2)-N(1)-C(3)#1    | 121.9(3)  |
| C(2)-N(1)-Gd(1)     | 118.4(2)  |
| C(3)#1-N(1)-Gd(1)   | 117.3(2)  |
| H(3WA)-O(3W)-H(3WB) | 102.8(11) |
| Gd(2)-O(3W)-H(3WA)  | 120.0(8)  |
| Gd(2)-O(3W)-H(3WB)  | 133.5(12) |
| C(4)-O(3)-Gd(2)     | 157.7(3)  |
| H(4WA)-O(4W)-H(4WB) | 104.1(10) |
| Gd(2)-O(4W)-H(4WA)  | 121.4(8)  |
| Gd(2)-O(4W)-H(4WB)  | 123.8(14) |



|                      |          |
|----------------------|----------|
| C(4)-O(4)-Gd(1)#1    | 129.5(3) |
| H(5WA)-O(5W)-H(5WB)  | 98.8(7)  |
| Gd(4)-O(5W)-H(5WA)   | 120.1(8) |
| Gd(4)-O(5W)-H(5WB)   | 123.2(5) |
| C(10)-O(5)-Gd(1)     | 125.1(3) |
| H(6WA)-O(6W)-H(6WB)  | 102.9(9) |
| Gd(4)-O(6W)-H(6WA)   | 122.5(9) |
| Gd(4)-O(6W)-H(6WB)   | 116.7(6) |
| H(7WA)-O(7W)-H(7WB)  | 100.1(9) |
| Gd(4)-O(7W)-H(7WA)   | 135.2(7) |
| Gd(4)-O(7W)-H(7WB)   | 117.4(8) |
| C(5)-O(7)-Gd(1)      | 124.4(3) |
| H(8WA)-O(8W)-H(8WB)  | 102.9(9) |
| Gd(4)-O(8W)-H(8WA)   | 103.0(6) |
| Gd(4)-O(8W)-H(8WB)   | 120.2(7) |
| C(5)-O(8)-Gd(4)      | 146.2(3) |
| H(9WA)-O(9W)-H(9WB)  | 103.6(8) |
| Gd(3)-O(9W)-H(9WA)   | 131.9(8) |
| Gd(3)-O(9W)-H(9WB)   | 124.1(5) |
| C(12)-O(9)-Gd(1)#2   | 93.4(2)  |
| C(12)-O(10)-Gd(1)#2  | 90.0(2)  |
| C(11)-O(11)-Gd(1)#5  | 132.1(3) |
| C(13)-O(13)-Gd(2)    | 139.3(3) |
| C(13)-O(14)-Gd(3)    | 129.5(3) |
| C(16)-O(15)-Gd(3)    | 130.2(3) |
| C(16)-O(16)-Gd(2)#3  | 146.6(3) |
| C(17)-O(17)-Gd(4)    | 138.7(3) |
| C(24)-O(20)-Gd(4)    | 137.8(2) |
| H(20A)-O(20W)-H(20B) | 109.4    |
| Gd(4)-O(20W)-H(20A)  | 109.3    |
| Gd(4)-O(20W)-H(20B)  | 109.3    |
| C(24)-O(19)-Gd(3)    | 127.6(3) |
| H(21A)-O(21W)-H(21B) | 105.7(5) |
| Gd(4)-O(21W)-H(21A)  | 122.3(4) |
| Gd(4)-O(21W)-H(21B)  | 109.6(6) |
| C(23)-O(21)-Gd(3)    | 125.5(3) |

|                      |            |
|----------------------|------------|
| C(22)-O(23)-Gd(3)#4  | 90.5(2)    |
| C(22)-O(24)-Gd(3)#4  | 90.8(2)    |
| N(5)-Gd(1)-N(1)      | 126.89(11) |
| O(1)-Gd(1)-N(5)      | 73.86(11)  |
| O(1)-Gd(1)-N(1)      | 62.33(10)  |
| O(1)-Gd(1)-O(5)      | 81.40(11)  |
| O(1)-Gd(1)-O(7)      | 79.51(10)  |
| O(1)-Gd(1)-O(9)#4    | 79.98(11)  |
| O(1)-Gd(1)-O(10)#4   | 130.63(11) |
| O(4)#1-Gd(1)-N(5)    | 140.63(11) |
| O(4)#1-Gd(1)-O(1)    | 124.57(10) |
| O(4)#1-Gd(1)-N(1)    | 62.69(10)  |
| O(4)#1-Gd(1)-O(5)    | 82.69(11)  |
| O(4)#1-Gd(1)-O(7)    | 146.29(11) |
| O(4)#1-Gd(1)-O(9)#4  | 86.80(11)  |
| O(4)#1-Gd(1)-O(10)#4 | 72.71(11)  |
| O(5)-Gd(1)-N(5)      | 64.83(10)  |
| O(5)-Gd(1)-N(1)      | 79.72(10)  |
| O(5)-Gd(1)-O(7)      | 127.60(10) |
| O(5)-Gd(1)-O(9)#4    | 148.05(10) |
| O(5)-Gd(1)-O(10)#4   | 147.11(10) |
| O(7)-Gd(1)-N(5)      | 63.08(10)  |
| O(7)-Gd(1)-N(1)      | 129.71(10) |
| O(7)-Gd(1)-O(10)#4   | 73.59(10)  |
| O(9)#4-Gd(1)-N(5)    | 132.48(11) |
| O(9)#4-Gd(1)-N(1)    | 68.67(10)  |
| O(9)#4-Gd(1)-O(7)    | 73.71(10)  |
| O(9)#4-Gd(1)-O(10)#4 | 53.20(10)  |
| O(10)#4-Gd(1)-N(5)   | 124.78(11) |
| O(10)#4-Gd(1)-N(1)   | 106.68(10) |
| O(11)#5-Gd(1)-N(5)   | 70.71(11)  |
| O(11)#5-Gd(1)-O(1)   | 144.26(10) |
| O(11)#5-Gd(1)-N(1)   | 141.29(10) |
| O(11)#5-Gd(1)-O(4)#1 | 82.49(10)  |
| O(11)#5-Gd(1)-O(5)   | 79.55(11)  |
| O(11)#5-Gd(1)-O(7)   | 88.62(10)  |

|                       |            |
|-----------------------|------------|
| O(11)#5-Gd(1)-O(9)#4  | 128.86(11) |
| O(11)#5-Gd(1)-O(10)#4 | 75.93(10)  |
| O(1W)-Gd(2)-O(2)      | 77.28(11)  |
| O(1W)-Gd(2)-O(4W)     | 141.73(11) |
| O(1W)-Gd(2)-O(13)     | 79.05(11)  |
| O(2)-Gd(2)-O(13)      | 143.53(10) |
| O(2W)-Gd(2)-O(1W)     | 98.89(13)  |
| O(2W)-Gd(2)-O(2)      | 71.27(11)  |
| O(2W)-Gd(2)-O(3W)     | 146.07(11) |
| O(2W)-Gd(2)-O(4W)     | 85.59(13)  |
| O(2W)-Gd(2)-O(13)     | 140.15(11) |
| O(2W)-Gd(2)-O(16)#3   | 71.24(11)  |
| O(3W)-Gd(2)-O(1W)     | 84.89(12)  |
| O(3W)-Gd(2)-O(2)      | 76.84(11)  |
| O(3W)-Gd(2)-O(4W)     | 112.14(13) |
| O(3W)-Gd(2)-O(13)     | 73.76(10)  |
| O(3)-Gd(2)-O(1W)      | 144.07(11) |
| O(3)-Gd(2)-O(2)       | 69.26(10)  |
| O(3)-Gd(2)-O(2W)      | 82.77(12)  |
| O(3)-Gd(2)-O(3W)      | 75.29(11)  |
| O(3)-Gd(2)-O(4W)      | 74.15(11)  |
| O(3)-Gd(2)-O(13)      | 121.87(11) |
| O(3)-Gd(2)-O(16)#3    | 140.90(12) |
| O(4W)-Gd(2)-O(2)      | 138.52(10) |
| O(4W)-Gd(2)-O(13)     | 73.87(11)  |
| O(16)#3-Gd(2)-O(1W)   | 70.59(12)  |
| O(16)#3-Gd(2)-O(2)    | 125.10(11) |
| O(16)#3-Gd(2)-O(3W)   | 139.76(11) |
| O(16)#3-Gd(2)-O(4W)   | 75.16(12)  |
| O(16)#3-Gd(2)-O(13)   | 70.65(11)  |
| N(3)-Gd(3)-N(2)       | 128.89(10) |
| O(9W)-Gd(3)-N(2)      | 141.86(10) |
| O(9W)-Gd(3)-N(3)      | 74.11(10)  |
| O(9W)-Gd(3)-O(14)     | 149.15(10) |
| O(9W)-Gd(3)-O(15)     | 81.74(10)  |
| O(9W)-Gd(3)-O(19)     | 86.40(11)  |

|                       |            |
|-----------------------|------------|
| O(9W)-Gd(3)-O(23)#2   | 73.31(10)  |
| O(9W)-Gd(3)-O(24)#2   | 125.54(10) |
| O(14)-Gd(3)-N(2)      | 61.20(10)  |
| O(14)-Gd(3)-N(3)      | 75.22(10)  |
| O(14)-Gd(3)-O(23)#2   | 130.86(10) |
| O(14)-Gd(3)-O(24)#2   | 78.16(10)  |
| O(15)-Gd(3)-N(2)      | 60.85(10)  |
| O(15)-Gd(3)-N(3)      | 137.66(11) |
| O(15)-Gd(3)-O(14)     | 120.25(10) |
| O(15)-Gd(3)-O(19)     | 150.13(10) |
| O(15)-Gd(3)-O(23)#2   | 73.68(11)  |
| O(15)-Gd(3)-O(24)#2   | 92.11(11)  |
| O(19)-Gd(3)-N(2)      | 129.80(10) |
| O(19)-Gd(3)-N(3)      | 62.69(10)  |
| O(19)-Gd(3)-O(14)     | 82.53(10)  |
| O(19)-Gd(3)-O(23)#2   | 76.68(10)  |
| O(19)-Gd(3)-O(24)#2   | 72.80(11)  |
| O(21)-Gd(3)-N(2)      | 83.49(11)  |
| O(21)-Gd(3)-N(3)      | 65.19(10)  |
| O(21)-Gd(3)-O(9W)     | 81.13(10)  |
| O(21)-Gd(3)-O(14)     | 83.17(10)  |
| O(21)-Gd(3)-O(15)     | 77.24(11)  |
| O(21)-Gd(3)-O(19)     | 127.86(10) |
| O(21)-Gd(3)-O(23)#2   | 143.48(10) |
| O(21)-Gd(3)-O(24)#2   | 149.99(11) |
| O(23)#2-Gd(3)-N(2)    | 100.78(11) |
| O(23)#2-Gd(3)-N(3)    | 128.67(10) |
| O(24)#2-Gd(3)-N(2)    | 66.98(10)  |
| O(24)#2-Gd(3)-N(3)    | 130.23(10) |
| O(24)#2-Gd(3)-O(23)#2 | 53.32(10)  |
| O(5W)-Gd(4)-O(8W)     | 69.91(10)  |
| O(5W)-Gd(4)-O(20)     | 135.83(10) |
| O(6W)-Gd(4)-O(5W)     | 65.51(11)  |
| O(6W)-Gd(4)-O(8W)     | 119.88(11) |
| O(6W)-Gd(4)-O(20)     | 113.22(9)  |
| O(7W)-Gd(4)-O(5W)     | 73.43(10)  |

|                      |            |
|----------------------|------------|
| O(7W)-Gd(4)-O(6W)    | 70.47(11)  |
| O(7W)-Gd(4)-O(8W)    | 130.29(11) |
| O(7W)-Gd(4)-O(20)    | 65.82(9)   |
| O(8W)-Gd(4)-O(20)    | 126.84(9)  |
| O(8)-Gd(4)-O(5W)     | 85.86(11)  |
| O(8)-Gd(4)-O(6W)     | 66.81(11)  |
| O(8)-Gd(4)-O(7W)     | 137.13(10) |
| O(8)-Gd(4)-O(8W)     | 71.85(10)  |
| O(8)-Gd(4)-O(20)     | 136.35(10) |
| O(17)-Gd(4)-O(5W)    | 84.75(11)  |
| O(17)-Gd(4)-O(6W)    | 140.16(12) |
| O(17)-Gd(4)-O(7W)    | 76.16(11)  |
| O(17)-Gd(4)-O(8W)    | 68.22(11)  |
| O(17)-Gd(4)-O(8)     | 139.81(10) |
| O(17)-Gd(4)-O(20)    | 69.97(9)   |
| O(17)-Gd(4)-O(20W)   | 82.95(12)  |
| O(17)-Gd(4)-O(21W)   | 134.63(10) |
| O(20W)-Gd(4)-O(5W)   | 140.49(11) |
| O(20W)-Gd(4)-O(6W)   | 136.82(12) |
| O(20W)-Gd(4)-O(7W)   | 138.13(11) |
| O(20W)-Gd(4)-O(8W)   | 70.64(11)  |
| O(20W)-Gd(4)-O(8)    | 79.89(11)  |
| O(20W)-Gd(4)-O(20)   | 73.05(10)  |
| O(20W)-Gd(4)-O(21W)  | 74.62(11)  |
| O(21W)-Gd(4)-O(5W)   | 135.96(10) |
| O(21W)-Gd(4)-O(6W)   | 70.55(11)  |
| O(21W)-Gd(4)-O(7W)   | 94.99(10)  |
| O(21W)-Gd(4)-O(8W)   | 134.72(10) |
| O(21W)-Gd(4)-O(8)    | 74.26(10)  |
| O(21W)-Gd(4)-O(20)   | 65.97(8)   |
| H(15A)-O(15W)-H(15B) | 109.8      |
| H(10A)-O(10W)-H(10B) | 102.0(9)   |
| H(16A)-O(16W)-H(16B) | 109.6      |
| H(13A)-O(13W)-H(13B) | 129.8      |
| H(19A)-O(19W)-H(19B) | 109.5      |
| H(17A)-O(17W)-H(17B) | 109.6      |

|                      |          |
|----------------------|----------|
| H(18A)-O(18W)-H(18B) | 109.4    |
| H(14A)-O(14W)-H(14B) | 109.4    |
| H(12A)-O(12W)-H(12B) | 103.5(9) |
| H(11A)-O(11W)-H(11B) | 102.4(9) |

---

Symmetry transformations used to generate equivalent atoms:

#1  $-x+3, -y+1, -z$  #2  $x-1, y, z$  #3  $-x+2, -y+1, -z+1$

#4  $x+1, y, z$  #5  $-x+2, -y+2, -z$

Table S4. Anisotropic displacement parameters ( $\text{\AA}^2 \times 10^3$ ) for **1**. The anisotropic displacement factor exponent takes the form:  $-2\pi^2 [ h^2 a^{*2} U^{11} + \dots + 2 h k a^* b^* U^{12} ]$

|       | U <sup>11</sup> | U <sup>22</sup> | U <sup>33</sup> | U <sup>23</sup> | U <sup>13</sup> | U <sup>12</sup> |
|-------|-----------------|-----------------|-----------------|-----------------|-----------------|-----------------|
| C(1)  | 9(2)            | 12(2)           | 6(1)            | -5(1)           | 0(1)            | 1(1)            |
| C(2)  | 8(1)            | 8(1)            | 5(1)            | -3(1)           | -1(1)           | 1(1)            |
| C(3)  | 7(1)            | 10(1)           | 7(1)            | -3(1)           | 1(1)            | -2(1)           |
| C(4)  | 12(1)           | 11(1)           | 8(1)            | -2(1)           | 3(1)            | 2(1)            |
| C(5)  | 11(2)           | 11(2)           | 10(2)           | -4(1)           | -1(1)           | -1(1)           |
| C(6)  | 6(1)            | 11(1)           | 8(1)            | -3(1)           | 0(1)            | 0(1)            |
| C(7)  | 8(1)            | 10(1)           | 6(1)            | -2(1)           | 1(1)            | 0(1)            |
| C(8)  | 7(1)            | 10(1)           | 7(1)            | -2(1)           | 1(1)            | 0(1)            |
| C(9)  | 9(1)            | 8(1)            | 10(1)           | -3(1)           | 1(1)            | -1(1)           |
| C(10) | 7(1)            | 14(1)           | 17(1)           | -7(1)           | 4(1)            | 2(1)            |
| C(11) | 5(1)            | 13(1)           | 13(1)           | -6(1)           | -2(1)           | 3(1)            |
| C(12) | 6(1)            | 9(1)            | 9(1)            | -4(1)           | 1(1)            | 1(1)            |
| C(13) | 11(2)           | 12(2)           | 6(1)            | -2(1)           | 2(1)            | -2(1)           |
| C(14) | 8(1)            | 9(1)            | 8(1)            | -4(1)           | 1(1)            | -1(1)           |
| C(15) | 8(1)            | 9(1)            | 5(1)            | -2(1)           | 1(1)            | 0(1)            |
| C(16) | 7(1)            | 19(2)           | 7(1)            | -6(1)           | 3(1)            | -5(1)           |
| C(17) | 7(2)            | 17(2)           | 12(2)           | 1(1)            | 1(1)            | -1(1)           |
| C(18) | 10(1)           | 11(1)           | 11(1)           | -1(1)           | -2(1)           | -1(1)           |
| C(19) | 7(1)            | 10(1)           | 9(1)            | 0(1)            | -1(1)           | 0(1)            |
| C(20) | 8(1)            | 12(1)           | 10(1)           | -1(1)           | -1(1)           | 1(1)            |
| C(21) | 4(1)            | 11(1)           | 4(1)            | -3(1)           | -1(1)           | 0(1)            |
| C(22) | 10(2)           | 12(2)           | 9(2)            | 2(1)            | 1(1)            | 1(1)            |
| C(23) | 7(1)            | 11(1)           | 10(1)           | -1(1)           | 0(1)            | -1(1)           |
| C(24) | 10(2)           | 10(2)           | 10(2)           | -2(1)           | -2(1)           | 2(1)            |
| N(2)  | 8(1)            | 11(1)           | 6(1)            | -2(1)           | 0(1)            | 1(1)            |
| N(3)  | 6(1)            | 7(1)            | 6(1)            | -3(1)           | 1(1)            | 3(1)            |
| N(5)  | 11(1)           | 10(1)           | 9(1)            | -4(1)           | 0(1)            | -2(1)           |
| N(6)  | 9(1)            | 12(1)           | 10(1)           | -4(1)           | 0(1)            | 1(1)            |
| N(4)  | 10(1)           | 16(1)           | 11(1)           | 1(1)            | -1(1)           | -2(1)           |
| O(1)  | 14(1)           | 12(1)           | 10(1)           | -3(1)           | 4(1)            | 4(1)            |
| O(1W) | 16(1)           | 18(1)           | 21(2)           | 3(1)            | 9(1)            | 8(1)            |

|        |       |       |       |        |        |        |
|--------|-------|-------|-------|--------|--------|--------|
| O(2)   | 14(1) | 16(1) | 6(1)  | -1(1)  | 3(1)   | 0(1)   |
| O(2W)  | 36(2) | 27(2) | 13(1) | -11(1) | 4(1)   | -21(1) |
| N(1)   | 8(1)  | 11(1) | 7(1)  | -2(1)  | 2(1)   | 0(1)   |
| O(3W)  | 22(1) | 23(1) | 13(1) | -8(1)  | 11(1)  | -13(1) |
| O(3)   | 24(2) | 15(1) | 6(1)  | -2(1)  | 5(1)   | 8(1)   |
| O(4W)  | 36(2) | 24(2) | 9(1)  | 0(1)   | 3(1)   | 10(2)  |
| O(4)   | 16(1) | 11(1) | 12(1) | -1(1)  | 4(1)   | 4(1)   |
| O(5W)  | 20(2) | 21(2) | 19(2) | 2(1)   | 5(1)   | 0(1)   |
| O(5)   | 6(1)  | 14(1) | 15(1) | -8(1)  | 2(1)   | 0(1)   |
| O(6W)  | 26(2) | 16(1) | 23(2) | -4(1)  | -11(1) | 2(1)   |
| O(6)   | 11(1) | 20(1) | 20(1) | -14(1) | 1(1)   | 0(1)   |
| O(7W)  | 19(1) | 16(1) | 13(1) | -5(1)  | 2(1)   | -4(1)  |
| O(7)   | 7(1)  | 15(1) | 17(1) | -9(1)  | 0(1)   | 1(1)   |
| O(8W)  | 12(1) | 26(2) | 14(1) | -7(1)  | 2(1)   | 1(1)   |
| O(8)   | 10(1) | 19(1) | 11(1) | -9(1)  | -1(1)  | 4(1)   |
| O(9W)  | 11(1) | 14(1) | 16(1) | -11(1) | 1(1)   | -1(1)  |
| O(9)   | 8(1)  | 14(1) | 13(1) | 0(1)   | -3(1)  | -2(1)  |
| O(10)  | 9(1)  | 16(1) | 14(1) | 1(1)   | -2(1)  | -1(1)  |
| O(11)  | 13(1) | 10(1) | 11(1) | -1(1)  | -4(1)  | 2(1)   |
| O(12)  | 16(1) | 21(1) | 16(1) | -6(1)  | 6(1)   | -5(1)  |
| O(13)  | 14(1) | 15(1) | 7(1)  | -4(1)  | 2(1)   | -2(1)  |
| O(14)  | 10(1) | 13(1) | 13(1) | -5(1)  | 5(1)   | -2(1)  |
| O(15)  | 19(1) | 14(1) | 8(1)  | -5(1)  | 2(1)   | -8(1)  |
| O(16)  | 22(2) | 24(2) | 8(1)  | -4(1)  | 4(1)   | -10(1) |
| O(17)  | 19(1) | 20(1) | 10(1) | 1(1)   | -2(1)  | -4(1)  |
| O(18)  | 18(1) | 14(1) | 19(1) | 0(1)   | -8(1)  | -5(1)  |
| O(20)  | 13(1) | 12(1) | 10(1) | -1(1)  | -3(1)  | 0(1)   |
| O(20W) | 20(2) | 14(1) | 21(2) | -2(1)  | -2(1)  | 0(1)   |
| O(19)  | 8(1)  | 19(1) | 15(1) | 0(1)   | -1(1)  | -4(1)  |
| O(21W) | 14(1) | 29(2) | 16(1) | -2(1)  | -4(1)  | -4(1)  |
| O(21)  | 8(1)  | 15(1) | 16(1) | 4(1)   | -1(1)  | -1(1)  |
| O(22)  | 11(1) | 17(1) | 13(1) | 4(1)   | 0(1)   | 2(1)   |
| O(23)  | 9(1)  | 20(1) | 13(1) | -6(1)  | 1(1)   | -1(1)  |
| O(24)  | 12(1) | 15(1) | 13(1) | -6(1)  | 2(1)   | 1(1)   |
| Gd(1)  | 5(1)  | 8(1)  | 6(1)  | -2(1)  | 1(1)   | 2(1)   |
| Gd(2)  | 12(1) | 9(1)  | 6(1)  | -2(1)  | 3(1)   | 0(1)   |



|        |       |       |       |        |        |        |
|--------|-------|-------|-------|--------|--------|--------|
| Gd(3)  | 5(1)  | 9(1)  | 7(1)  | -2(1)  | 1(1)   | 0(1)   |
| Gd(4)  | 10(1) | 10(1) | 9(1)  | -3(1)  | 0(1)   | 0(1)   |
| O(15W) | 18(2) | 24(2) | 14(1) | 1(1)   | 4(1)   | 2(1)   |
| O(10W) | 20(1) | 17(1) | 14(1) | -2(1)  | 3(1)   | -3(1)  |
| O(16W) | 21(2) | 20(2) | 18(1) | -4(1)  | 6(1)   | -2(1)  |
| O(13W) | 43(2) | 38(2) | 27(2) | -2(2)  | 8(2)   | -19(2) |
| O(19W) | 28(2) | 20(2) | 19(2) | -1(1)  | 0(1)   | 1(1)   |
| O(17W) | 23(2) | 21(2) | 51(2) | -16(2) | -10(2) | 3(1)   |
| O(18W) | 28(2) | 30(2) | 24(2) | -7(2)  | 4(2)   | -7(2)  |
| O(14W) | 25(2) | 28(2) | 45(2) | 1(2)   | -14(2) | 2(2)   |
| O(12W) | 22(2) | 19(1) | 18(1) | -3(1)  | 1(1)   | -6(1)  |
| O(11W) | 26(2) | 31(2) | 92(4) | 24(2)  | -24(2) | -12(2) |

---

Table S5. Hydrogen coordinates ( $\times 10^4$ ) and isotropic displacement parameters ( $\text{\AA}^2 \times 10^{-3}$ ) for **1**.

|        | x         | y         | z        | U(eq)  |
|--------|-----------|-----------|----------|--------|
| H(3WA) | 14070(20) | 6487(8)   | 2692(3)  | 23(16) |
| H(9WA) | 12370(7)  | 9069(12)  | 6063(10) | 14(14) |
| H(9WB) | 10534(4)  | 9276(4)   | 6101(5)  | 20     |
| H(1WA) | 9298(10)  | 6295(12)  | 2961(4)  | 30     |
| H(1WB) | 10221(19) | 6771(5)   | 2395(5)  | 30     |
| H(2WA) | 9934(9)   | 3601(14)  | 2140(5)  | 35     |
| H(2WB) | 11167(15) | 3437(19)  | 1547(4)  | 35     |
| H(3WB) | 14871(11) | 6135(16)  | 2021(4)  | 28     |
| H(4WA) | 14571(12) | 3094(10)  | 2826(5)  | 37     |
| H(4WB) | 13760(20) | 3430(20)  | 3501(3)  | 37     |
| H(5WA) | 14351(10) | 11269(9)  | 1413(5)  | 31     |
| H(5WB) | 12858(8)  | 12021(4)  | 1464(3)  | 31     |
| H(6WA) | 9563(12)  | 11523(10) | 1595(4)  | 32     |
| H(6WB) | 9609(17)  | 12043(7)  | 2255(4)  | 32     |
| H(7WA) | 12472(13) | 12326(5)  | 3072(7)  | 24     |
| H(7WB) | 11820(20) | 11635(9)  | 3585(3)  | 24     |
| H(8WA) | 13875(10) | 9304(9)   | 1304(4)  | 26     |
| H(8WB) | 15241(8)  | 9797(7)   | 1535(8)  | 26     |
| H(20A) | 13177     | 8355      | 2638     | 27     |
| H(20B) | 11936     | 8367      | 2227     | 27     |
| H(21A) | 8626(6)   | 10057(6)  | 2347(2)  | 29     |
| H(21B) | 8899(12)  | 10519(4)  | 3010(2)  | 29     |
| H(15A) | 6066      | 6663      | 1040     | 30     |
| H(15B) | 6885      | 5838      | 1317     | 30     |
| H(10A) | 13833(8)  | 7106(12)  | 3656(5)  | 25     |
| H(10B) | 15567(6)  | 7048(18)  | 3376(9)  | 25     |
| H(16A) | 10586     | 8155      | 1605     | 30     |
| H(16B) | 9425      | 7575      | 1720     | 30     |
| H(13A) | 8932      | 8919      | 2972     | 53     |
| H(13B) | 8140      | 8004      | 3215     | 53     |

|        |           |         |          |    |
|--------|-----------|---------|----------|----|
| H(19A) | 15890     | 1725    | 2914     | 35 |
| H(19B) | 15766     | 1901    | 2242     | 35 |
| H(17A) | 8701      | 4525    | 842      | 47 |
| H(17B) | 9402      | 5154    | 1200     | 47 |
| H(18A) | 7846      | 3421    | 2418     | 41 |
| H(18B) | 8427      | 3103    | 3020     | 41 |
| H(14A) | 6325      | 8341    | 1971     | 50 |
| H(14B) | 6850      | 7361    | 2001     | 50 |
| H(12A) | 7678(14)  | 6817(5) | 3973(3)  | 29 |
| H(12B) | 7306(18)  | 5861(5) | 3710(8)  | 29 |
| H(11A) | 15036(8)  | 5146(9) | 3744(9)  | 73 |
| H(11B) | 16222(18) | 4282(5) | 3976(10) | 73 |

---

Table S6. Torsion angles [°] for **1**.

---

|                          |           |
|--------------------------|-----------|
| C(1)-C(2)-C(3)-C(4)      | -4.0(7)   |
| C(1)-C(2)-C(3)-N(1)#1    | 178.8(4)  |
| C(1)-C(2)-N(1)-C(3)#1    | -178.9(4) |
| C(1)-C(2)-N(1)-Gd(1)     | 19.5(4)   |
| C(2)-C(1)-O(1)-Gd(1)     | 17.3(5)   |
| C(2)-C(1)-O(2)-Gd(2)     | 82.6(5)   |
| C(2)-C(3)-C(4)-O(3)      | -13.8(7)  |
| C(2)-C(3)-C(4)-O(4)      | 167.8(4)  |
| C(3)-C(2)-N(1)-C(3)#1    | 0.4(6)    |
| C(3)-C(2)-N(1)-Gd(1)     | -161.2(3) |
| C(3)-C(4)-O(3)-Gd(2)     | 57.3(10)  |
| C(3)-C(4)-O(4)-Gd(1)#1   | 0.2(6)    |
| C(5)-C(6)-C(7)-C(11)     | 8.7(6)    |
| C(5)-C(6)-C(7)-N(6)      | -172.0(4) |
| C(5)-C(6)-N(5)-C(9)      | 174.7(3)  |
| C(5)-C(6)-N(5)-Gd(1)     | -11.8(5)  |
| C(6)-C(5)-O(7)-Gd(1)     | -8.2(5)   |
| C(6)-C(5)-O(8)-Gd(4)     | 144.7(4)  |
| C(6)-C(7)-C(11)-O(11)    | 63.9(5)   |
| C(6)-C(7)-C(11)-O(12)    | -118.3(4) |
| C(6)-C(7)-N(6)-C(8)      | -2.9(6)   |
| C(7)-C(6)-N(5)-C(9)      | -1.0(6)   |
| C(7)-C(6)-N(5)-Gd(1)     | 172.5(3)  |
| C(7)-C(11)-O(11)-Gd(1)#5 | 82.8(4)   |
| C(8)-C(9)-C(10)-O(5)     | -177.1(4) |
| C(8)-C(9)-C(10)-O(6)     | 5.1(6)    |
| C(8)-C(9)-N(5)-C(6)      | -1.1(6)   |
| C(8)-C(9)-N(5)-Gd(1)     | -174.8(3) |
| C(8)-C(12)-O(9)-Gd(1)#2  | 169.1(3)  |
| C(8)-C(12)-O(10)-Gd(1)#2 | -169.3(3) |
| C(9)-C(8)-C(12)-O(9)     | 80.1(5)   |
| C(9)-C(8)-C(12)-O(10)    | -104.0(4) |
| C(9)-C(8)-N(6)-C(7)      | 0.8(6)    |

|                           |           |
|---------------------------|-----------|
| C(9)-C(10)-O(5)-Gd(1)     | -11.9(5)  |
| C(10)-C(9)-N(5)-C(6)      | 177.0(4)  |
| C(10)-C(9)-N(5)-Gd(1)     | 3.3(4)    |
| C(11)-C(7)-N(6)-C(8)      | 176.4(3)  |
| C(12)-C(8)-C(9)-C(10)     | 8.3(6)    |
| C(12)-C(8)-C(9)-N(5)      | -173.8(4) |
| C(12)-C(8)-N(6)-C(7)      | 176.3(3)  |
| C(13)-C(14)-N(2)-C(15)    | -176.6(3) |
| C(13)-C(14)-N(2)-Gd(3)    | 25.3(4)   |
| C(14)-C(13)-O(13)-Gd(2)   | 78.2(5)   |
| C(14)-C(13)-O(14)-Gd(3)   | 4.4(5)    |
| C(14)#3-C(15)-C(16)-O(15) | -164.9(4) |
| C(14)#3-C(15)-C(16)-O(16) | 18.9(6)   |
| C(14)#3-C(15)-N(2)-C(14)  | 0.0(6)    |
| C(14)#3-C(15)-N(2)-Gd(3)  | 158.2(3)  |
| C(15)#3-C(14)-N(2)-C(15)  | 0.0(6)    |
| C(15)#3-C(14)-N(2)-Gd(3)  | -158.1(3) |
| C(15)-C(16)-O(15)-Gd(3)   | -3.6(5)   |
| C(15)-C(16)-O(16)-Gd(2)#3 | -76.9(6)  |
| C(16)-C(15)-N(2)-C(14)    | 175.1(3)  |
| C(16)-C(15)-N(2)-Gd(3)    | -26.7(4)  |
| C(17)-C(18)-C(19)-C(24)   | -5.9(7)   |
| C(17)-C(18)-C(19)-N(3)    | 174.8(4)  |
| C(17)-C(18)-N(4)-C(21)    | -173.2(3) |
| C(18)-C(17)-O(17)-Gd(4)   | 90.8(5)   |
| C(18)-C(19)-C(24)-O(20)   | 0.2(6)    |
| C(18)-C(19)-C(24)-O(19)   | -178.8(4) |
| C(18)-C(19)-N(3)-C(20)    | -0.7(5)   |
| C(18)-C(19)-N(3)-Gd(3)    | 178.5(3)  |
| C(19)-C(18)-N(4)-C(21)    | 3.1(6)    |
| C(19)-C(24)-O(20)-Gd(4)   | 69.5(5)   |
| C(19)-C(24)-O(19)-Gd(3)   | 0.1(5)    |
| C(20)-C(21)-C(22)-O(23)   | -93.5(5)  |
| C(20)-C(21)-C(22)-O(24)   | 91.8(5)   |
| C(20)-C(21)-C(22)-Gd(3)#4 | 161.8(11) |
| C(20)-C(21)-N(4)-C(18)    | -3.5(6)   |

|                           |           |
|---------------------------|-----------|
| C(20)-C(23)-O(21)-Gd(3)   | 0.1(5)    |
| C(21)-C(20)-C(23)-O(21)   | 179.6(4)  |
| C(21)-C(20)-C(23)-O(22)   | -1.2(6)   |
| C(21)-C(20)-N(3)-C(19)    | 0.4(5)    |
| C(21)-C(20)-N(3)-Gd(3)    | -178.8(3) |
| C(21)-C(22)-O(23)-Gd(3)#4 | -166.4(3) |
| C(21)-C(22)-O(24)-Gd(3)#4 | 166.6(3)  |
| C(22)-C(21)-N(4)-C(18)    | 175.8(3)  |
| C(23)-C(20)-C(21)-C(22)   | 1.2(6)    |
| C(23)-C(20)-C(21)-N(4)    | -179.5(4) |
| C(23)-C(20)-N(3)-C(19)    | -178.4(3) |
| C(23)-C(20)-N(3)-Gd(3)    | 2.4(4)    |
| C(24)-C(19)-N(3)-C(20)    | 179.8(3)  |
| C(24)-C(19)-N(3)-Gd(3)    | -1.0(4)   |
| N(2)-C(15)-C(16)-O(15)    | 20.7(5)   |
| N(2)-C(15)-C(16)-O(16)    | -155.5(4) |
| N(3)-C(19)-C(24)-O(20)    | 179.6(3)  |
| N(3)-C(19)-C(24)-O(19)    | 0.6(5)    |
| N(3)-C(20)-C(21)-C(22)    | -177.5(3) |
| N(3)-C(20)-C(21)-N(4)     | 1.8(6)    |
| N(3)-C(20)-C(23)-O(21)    | -1.7(5)   |
| N(3)-C(20)-C(23)-O(22)    | 177.6(4)  |
| N(5)-C(6)-C(7)-C(11)      | -176.2(4) |
| N(5)-C(6)-C(7)-N(6)       | 3.1(6)    |
| N(5)-C(9)-C(10)-O(5)      | 4.9(5)    |
| N(5)-C(9)-C(10)-O(6)      | -172.9(4) |
| N(6)-C(7)-C(11)-O(11)     | -115.4(4) |
| N(6)-C(7)-C(11)-O(12)     | 62.4(5)   |
| N(6)-C(8)-C(9)-C(10)      | -176.6(4) |
| N(6)-C(8)-C(9)-N(5)       | 1.3(6)    |
| N(6)-C(8)-C(12)-O(9)      | -95.4(4)  |
| N(6)-C(8)-C(12)-O(10)     | 80.5(4)   |
| N(4)-C(18)-C(19)-C(24)    | 178.3(4)  |
| N(4)-C(18)-C(19)-N(3)     | -1.1(6)   |
| N(4)-C(21)-C(22)-O(23)    | 87.2(5)   |
| N(4)-C(21)-C(22)-O(24)    | -87.4(4)  |

|                           |           |
|---------------------------|-----------|
| N(4)-C(21)-C(22)-Gd(3)#4  | -17.5(15) |
| O(1)-C(1)-C(2)-C(3)       | 157.6(4)  |
| O(1)-C(1)-C(2)-N(1)       | -23.1(5)  |
| O(1)-C(1)-O(2)-Gd(2)      | -99.8(5)  |
| O(2)-C(1)-C(2)-C(3)       | -24.5(6)  |
| O(2)-C(1)-C(2)-N(1)       | 154.7(4)  |
| O(2)-C(1)-O(1)-Gd(1)      | -160.4(3) |
| N(1)-C(2)-C(3)-C(4)       | 176.8(4)  |
| N(1)-C(2)-C(3)-N(1)#1     | -0.4(6)   |
| N(1)#1-C(3)-C(4)-O(3)     | 163.6(4)  |
| N(1)#1-C(3)-C(4)-O(4)     | -14.8(5)  |
| O(3)-C(4)-O(4)-Gd(1)#1    | -178.1(3) |
| O(4)-C(4)-O(3)-Gd(2)      | -124.5(7) |
| O(6)-C(10)-O(5)-Gd(1)     | 165.7(3)  |
| O(7)-C(5)-C(6)-C(7)       | -171.9(4) |
| O(7)-C(5)-C(6)-N(5)       | 12.8(5)   |
| O(7)-C(5)-O(8)-Gd(4)      | -34.1(8)  |
| O(8)-C(5)-C(6)-C(7)       | 9.1(6)    |
| O(8)-C(5)-C(6)-N(5)       | -166.2(4) |
| O(8)-C(5)-O(7)-Gd(1)      | 170.7(3)  |
| O(9)-C(12)-O(10)-Gd(1)#2  | 6.5(4)    |
| O(10)-C(12)-O(9)-Gd(1)#2  | -6.7(4)   |
| O(12)-C(11)-O(11)-Gd(1)#5 | -94.8(5)  |
| O(13)-C(13)-C(14)-C(15)#3 | -19.8(6)  |
| O(13)-C(13)-C(14)-N(2)    | 156.4(4)  |
| O(13)-C(13)-O(14)-Gd(3)   | -171.9(3) |
| O(14)-C(13)-C(14)-C(15)#3 | 163.8(4)  |
| O(14)-C(13)-C(14)-N(2)    | -20.0(5)  |
| O(14)-C(13)-O(13)-Gd(2)   | -105.8(5) |
| O(15)-C(16)-O(16)-Gd(2)#3 | 107.3(6)  |
| O(16)-C(16)-O(15)-Gd(3)   | 172.3(3)  |
| O(17)-C(17)-C(18)-C(19)   | -52.9(6)  |
| O(17)-C(17)-C(18)-N(4)    | 123.3(4)  |
| O(18)-C(17)-C(18)-C(19)   | 131.5(4)  |
| O(18)-C(17)-C(18)-N(4)    | -52.3(5)  |
| O(18)-C(17)-O(17)-Gd(4)   | -94.1(6)  |

|                           |           |
|---------------------------|-----------|
| O(20)-C(24)-O(19)-Gd(3)   | -178.9(3) |
| O(19)-C(24)-O(20)-Gd(4)   | -111.6(4) |
| O(22)-C(23)-O(21)-Gd(3)   | -179.1(3) |
| O(23)-C(22)-O(24)-Gd(3)#4 | -7.8(4)   |
| O(24)-C(22)-O(23)-Gd(3)#4 | 7.7(4)    |

---

Symmetry transformations used to generate equivalent atoms:

#1  $-x+3, -y+1, -z$  #2  $x-1, y, z$  #3  $-x+2, -y+1, -z+1$

#4  $x+1, y, z$  #5  $-x+2, -y+2, -z$



Table S7. Hydrogen bonds lengths [ $\text{\AA}$ ] and angles [ $^\circ$ ] for **1**.

| D-H...A                  | d(D-H)    | d(H...A)  | d(D...A) | <(DHA)    |
|--------------------------|-----------|-----------|----------|-----------|
| O(9W)-H(9WA)...O(18)#6   | 0.986(8)  | 1.881(7)  | 2.828(4) | 160.2(13) |
| O(1W)-H(1WA)...O(12W)    | 1.007(7)  | 1.804(7)  | 2.809(4) | 176.6(14) |
| O(1W)-H(1WB)...O(16W)    | 0.985(7)  | 1.713(7)  | 2.684(5) | 168.0(10) |
| O(2W)-H(2WA)...O(18W)    | 0.984(8)  | 1.781(11) | 2.736(5) | 162.7(13) |
| O(2W)-H(2WB)...O(6)#7    | 0.987(13) | 1.702(8)  | 2.665(4) | 164(2)    |
| O(3W)-H(3WB)...O(15W)#4  | 0.985(8)  | 1.733(9)  | 2.709(5) | 170.1(12) |
| O(4W)-H(4WA)...O(19W)    | 0.981(7)  | 1.691(9)  | 2.638(5) | 160.7(14) |
| O(4W)-H(4WB)...O(22)#8   | 0.986(7)  | 1.713(8)  | 2.685(4) | 168(3)    |
| O(5W)-H(5WA)...O(10)#5   | 1.008(7)  | 1.957(10) | 2.809(4) | 140.5(8)  |
| O(6W)-H(6WA)...O(11)     | 0.996(7)  | 1.842(8)  | 2.834(5) | 174.3(13) |
| O(6W)-H(6WB)...O(18W)#9  | 0.984(7)  | 1.684(8)  | 2.638(5) | 162.1(11) |
| O(8W)-H(8WB)...O(12)#4   | 0.984(8)  | 1.905(8)  | 2.784(5) | 147.3(13) |
| O(20W)-H(20A)...O(10W)   | 0.85      | 2.14      | 2.846(5) | 139.9     |
| O(21W)-H(21A)...O(12)    | 0.975(4)  | 1.933(5)  | 2.890(4) | 166.3(8)  |
| O(15W)-H(15A)...O(9)     | 0.85      | 1.92      | 2.758(5) | 170.4     |
| O(15W)-H(15B)...O(17W)   | 0.85      | 1.90      | 2.693(5) | 153.9     |
| O(10W)-H(10A)...O(14)    | 0.986(7)  | 1.855(8)  | 2.807(4) | 161.3(10) |
| O(10W)-H(10B)...O(12W)#4 | 1.005(7)  | 1.890(8)  | 2.893(5) | 175(2)    |
| O(16W)-H(16B)...O(14W)   | 0.85      | 2.09      | 2.755(6) | 134.7     |
| O(13W)-H(13A)...O(21W)   | 0.86      | 1.78      | 2.626(5) | 165.2     |
| O(19W)-H(19A)...O(18)#10 | 0.85      | 1.90      | 2.744(5) | 172.2     |
| O(17W)-H(17A)...O(5)#7   | 0.85      | 2.06      | 2.873(5) | 161.8     |
| O(18W)-H(18A)...O(19W)#2 | 0.85      | 2.62      | 2.690(6) | 85.5      |
| O(18W)-H(18B)...O(15)#3  | 0.85      | 2.09      | 2.823(5) | 144.6     |
| O(14W)-H(14B)...O(15W)   | 0.85      | 2.04      | 2.831(6) | 153.9     |
| O(12W)-H(12A)...O(24)#2  | 0.984(6)  | 1.900(7)  | 2.810(4) | 152.5(10) |
| O(12W)-H(12B)...O(11W)#2 | 0.985(8)  | 1.729(11) | 2.681(5) | 161.4(14) |
| O(11W)-H(11B)...O(21)#8  | 0.983(7)  | 1.866(9)  | 2.818(5) | 162.3(17) |

Symmetry transformations used to generate equivalent atoms:

#1 -x+3,-y+1,-z #2 x-1,y,z #3 -x+2,-y+1,-z+1, #4 x+1,y,z #5 -x+2,-y+2,-z #6 -x+3,-y+2,-z+1  
#7 -x+2,-y+1,-z #8 -x+3,-y+1,-z+1 #9 x,y+1,z , #10 x,y-1,z



Table S8. Crystal data and structure refinement for **2**.

|                                   |                                                                                |                 |
|-----------------------------------|--------------------------------------------------------------------------------|-----------------|
| Identification code               | <b>2</b>                                                                       |                 |
| Empirical formula                 | C <sub>24</sub> H <sub>42</sub> N <sub>6</sub> O <sub>45</sub> Tb <sub>4</sub> |                 |
| Formula weight                    | 1770.31                                                                        |                 |
| Temperature                       | 110(2) K                                                                       |                 |
| Wavelength                        | 0.71073 Å                                                                      |                 |
| Crystal system                    | Triclinic                                                                      |                 |
| Space group                       | P-1                                                                            |                 |
| Unit cell dimensions              | a = 8.5627(15) Å                                                               | α = 88.568(3)°. |
|                                   | b = 14.078(3) Å                                                                | β = 86.325(4)°. |
|                                   | c = 20.297(4) Å                                                                | γ = 81.382(3)°. |
| Volume                            | 2413.9(7) Å <sup>3</sup>                                                       |                 |
| Z                                 | 2                                                                              |                 |
| Density (calculated)              | 2.436 Mg/m <sup>3</sup>                                                        |                 |
| Absorption coefficient            | 5.923 mm <sup>-1</sup>                                                         |                 |
| F(000)                            | 1696                                                                           |                 |
| Crystal size                      | 0.833 x 0.106 x 0.032 mm <sup>3</sup>                                          |                 |
| Theta range for data collection   | 1.463 to 26.732°.                                                              |                 |
| Index ranges                      | -10 ≤ h ≤ 10, -17 ≤ k ≤ 17, -25 ≤ l ≤ 25                                       |                 |
| Reflections collected             | 19021                                                                          |                 |
| Independent reflections           | 10146 [R(int) = 0.1810]                                                        |                 |
| Completeness to theta = 26.000°   | 99.1 %                                                                         |                 |
| Absorption correction             | Semi-empirical from equivalents                                                |                 |
| Refinement method                 | Full-matrix least-squares on F <sup>2</sup>                                    |                 |
| Data / restraints / parameters    | 10146 / 874 / 787                                                              |                 |
| Goodness-of-fit on F <sup>2</sup> | 0.971                                                                          |                 |
| Final R indices [I > 2σ(I)]       | R1 = 0.1347, wR2 = 0.2557                                                      |                 |
| R indices (all data)              | R1 = 0.2457, wR2 = 0.2983                                                      |                 |
| Extinction coefficient            | n/a                                                                            |                 |
| Largest diff. peak and hole       | 4.694 and -4.535 e.Å <sup>-3</sup>                                             |                 |

Table S9. Atomic coordinates ( $\times 10^4$ ) and equivalent isotropic displacement parameters ( $\text{\AA}^2 \times 10^3$ ) for **2**.  $U(\text{eq})$  is defined as one third of the trace of the orthogonalized  $U^{ij}$  tensor.

|       | x         | y        | z       | $U(\text{eq})$ |
|-------|-----------|----------|---------|----------------|
| Tb(1) | 12736(1)  | 7627(1)  | -190(1) | 9(1)           |
| Tb(2) | 12352(1)  | 4856(1)  | 2480(1) | 13(1)          |
| Tb(3) | 1178(1)   | 7603(1)  | 5143(1) | 10(1)          |
| Tb(4) | 2113(1)   | 10298(1) | 2411(1) | 18(1)          |
| O(1)  | 12127(12) | 6751(8)  | 792(6)  | 9(1)           |
| O(1W) | 10180(5)  | 6144(3)  | 2640(2) | 20(2)          |
| O(2)  | 11900(13) | 5422(8)  | 1358(6) | 9(1)           |
| O(2W) | 11058(5)  | 3738(7)  | 1967(5) | 30(3)          |
| O(3)  | 14401(14) | 4175(8)  | 1752(6) | 14(1)          |
| O(3W) | 14023(5)  | 6017(3)  | 2343(2) | 25(3)          |
| O(4)  | 15895(13) | 3113(8)  | 1140(6) | 11(1)          |
| O(4W) | 13632(5)  | 3452(5)  | 3055(2) | 47(3)          |
| O(5)  | 10642(13) | 6884(8)  | -567(6) | 15(1)          |
| O(5W) | 3417(5)   | 11520(3) | 1720(2) | 31(3)          |
| O(6)  | 8079(12)  | 6998(6)  | -799(3) | 18(1)          |
| O(6W) | 233(6)    | 11622(5) | 1925(2) | 30(3)          |
| O(7)  | 12552(12) | 8911(8)  | 647(5)  | 11(1)          |
| O(7W) | 1990(7)   | 11754(3) | 3102(2) | 18(3)          |
| O(8)  | 11114(13) | 9897(8)  | 1364(6) | 14(1)          |
| O(8W) | 4340(5)   | 9470(4)  | 1698(2) | 22(3)          |
| O(9)  | 5256(13)  | 7466(8)  | 292(6)  | 12(1)          |
| O(9W) | 1446(4)   | 8831(4)  | 5906(3) | 21(3)          |
| O(10) | 5000(13)  | 8557(8)  | -507(5) | 12(1)          |
| O(11) | 8287(12)  | 11193(8) | 947(5)  | 12(1)          |
| O(12) | 6984(11)  | 10365(8) | 1743(6) | 14(1)          |
| O(13) | 12739(13) | 5362(8)  | 3557(6) | 16(1)          |
| O(14) | 12240(11) | 6641(8)  | 4177(5) | 14(1)          |
| O(15) | 10281(13) | 6816(8)  | 6137(6) | 10(1)          |
| O(16) | 9553(13)  | 5623(8)  | 6752(6) | 14(1)          |
| O(17) | 4573(15)  | 10075(9) | 2913(7) | 22(1)          |
| O(18) | 5598(11)  | 10918(9) | 3667(6) | 19(1)          |

|        |           |           |          |       |
|--------|-----------|-----------|----------|-------|
| O(19)  | 769(13)   | 8857(8)   | 4325(6)  | 13(1) |
| O(20)  | 1486(4)   | 9997(4)   | 3633(4)  | 14(1) |
| O(20W) | 2184(14)  | 8613(9)   | 2567(7)  | 25(3) |
| O(21)  | 3649(13)  | 6933(8)   | 5571(6)  | 16(1) |
| O(21W) | -564(16)  | 10068(10) | 2623(7)  | 35(3) |
| O(22)  | 6205(13)  | 6827(8)   | 5668(5)  | 15(1) |
| O(23)  | 8458(14)  | 8422(9)   | 5458(5)  | 19(1) |
| O(24)  | 8731(13)  | 7403(8)   | 4592(6)  | 16(1) |
| N(1)   | 14004(16) | 5856(10)  | -120(7)  | 10(1) |
| N(2)   | 10721(16) | 5743(10)  | 5083(7)  | 11(1) |
| N(3)   | 3568(16)  | 8329(10)  | 4723(7)  | 11(1) |
| N(4)   | 6228(17)  | 9157(10)  | 4311(8)  | 16(1) |
| N(5)   | 9996(16)  | 8360(10)  | 229(8)   | 13(1) |
| N(6)   | 6946(16)  | 9241(10)  | 565(7)   | 12(1) |
| C(1)   | 12521(19) | 5866(12)  | 915(9)   | 9(1)  |
| C(2)   | 13900(20) | 5374(12)  | 464(9)   | 12(1) |
| C(3)   | 14921(19) | 4539(12)  | 608(9)   | 9(1)  |
| C(4)   | 15070(20) | 3886(12)  | 1216(9)  | 11(1) |
| C(5)   | 11300(20) | 9327(12)  | 909(9)   | 12(1) |
| C(6)   | 9760(20)  | 9124(12)  | 629(9)   | 13(1) |
| C(7)   | 8220(20)  | 9547(12)  | 760(9)   | 12(1) |
| C(8)   | 7210(20)  | 8492(12)  | 163(9)   | 13(1) |
| C(9)   | 8650(20)  | 8025(13)  | -31(9)   | 14(1) |
| C(10)  | 9210(20)  | 7191(13)  | -480(10) | 15(1) |
| O(10W) | 4514(5)   | 7269(5)   | 3261(3)  | 34(3) |
| C(11)  | 7790(20)  | 10443(12) | 1203(9)  | 13(1) |
| C(12)  | 5740(20)  | 8138(12)  | -27(9)   | 13(1) |
| C(13)  | 12040(20) | 5812(13)  | 4019(9)  | 14(1) |
| C(14)  | 10880(20) | 5383(12)  | 4530(9)  | 11(1) |
| C(15)  | 9801(19)  | 5477(12)  | 5580(9)  | 10(1) |
| C(16)  | 9860(19)  | 6016(12)  | 6223(9)  | 9(1)  |
| C(17)  | 4910(20)  | 10231(13) | 3533(10) | 17(1) |
| C(18)  | 4780(20)  | 9440(13)  | 4065(10) | 16(1) |
| C(19)  | 3460(20)  | 9022(12)  | 4272(9)  | 12(1) |
| C(20)  | 4980(20)  | 8001(12)  | 4949(9)  | 12(1) |
| C(21)  | 6260(20)  | 8395(13)  | 4747(10) | 14(1) |

|        |           |           |          |       |
|--------|-----------|-----------|----------|-------|
| C(22)  | 7880(20)  | 8068(13)  | 4976(10) | 16(1) |
| C(23)  | 4970(20)  | 7170(12)  | 5439(9)  | 12(1) |
| C(24)  | 1770(20)  | 9332(12)  | 4023(9)  | 13(1) |
| O(11W) | -3822(19) | 14910(11) | 3872(9)  | 55(3) |
| O(12W) | -2338(9)  | 16472(8)  | 3567(5)  | 21(3) |
| O(13W) | 8873(19)  | 8387(12)  | 3180(9)  | 54(3) |
| O(14W) | 7093(17)  | 7929(11)  | 2103(8)  | 45(3) |
| O(15W) | 6229(14)  | 6356(10)  | 1395(7)  | 25(3) |
| O(16W) | 10338(17) | 7655(9)   | 1840(6)  | 42(3) |
| O(17W) | 8770(20)  | 5079(12)  | 924(9)   | 64(3) |
| O(18W) | -1488(18) | 13001(9)  | 2613(8)  | 60(3) |
| O(19W) | 5981(14)  | 12166(8)  | 2587(7)  | 35(3) |

---

Table S10. Bond lengths [ $\text{\AA}$ ] and angles [ $^\circ$ ] for **2**.

---

|               |           |
|---------------|-----------|
| Tb(1)-O(1)    | 2.389(12) |
| Tb(1)-O(5)    | 2.382(11) |
| Tb(1)-O(7)    | 2.493(11) |
| Tb(1)-N(1)    | 2.570(14) |
| Tb(1)-N(5)    | 2.522(14) |
| Tb(1)-O(9)#1  | 2.404(11) |
| Tb(1)-O(10)#1 | 2.538(11) |
| Tb(1)-O(11)#2 | 2.344(11) |
| Tb(1)-O(4)#3  | 2.370(12) |
| Tb(2)-O(1W)   | 2.407(4)  |
| Tb(2)-O(2)    | 2.429(12) |
| Tb(2)-O(2W)   | 2.354(8)  |
| Tb(2)-O(3)    | 2.327(12) |
| Tb(2)-O(3W)   | 2.329(4)  |
| Tb(2)-O(4W)   | 2.423(6)  |
| Tb(2)-O(13)   | 2.375(12) |
| Tb(2)-O(16)#4 | 2.345(12) |
| Tb(3)-O(9W)   | 2.395(6)  |
| Tb(3)-O(19)   | 2.396(12) |
| Tb(3)-O(21)   | 2.391(11) |
| Tb(3)-N(3)    | 2.513(14) |
| Tb(3)-O(14)#5 | 2.458(10) |
| Tb(3)-O(15)#5 | 2.415(12) |
| Tb(3)-O(23)#5 | 2.491(12) |
| Tb(3)-O(24)#5 | 2.493(11) |
| Tb(3)-N(2)#5  | 2.712(14) |
| Tb(4)-O(5W)   | 2.535(4)  |
| Tb(4)-O(6W)   | 2.500(6)  |
| Tb(4)-O(7W)   | 2.497(4)  |
| Tb(4)-O(8W)   | 2.481(5)  |
| Tb(4)-O(17)   | 2.373(13) |
| Tb(4)-O(20)   | 2.542(8)  |
| Tb(4)-O(20W)  | 2.378(13) |
| Tb(4)-O(21W)  | 2.374(14) |

|              |           |
|--------------|-----------|
| Tb(4)-O(8)#5 | 2.451(12) |
| O(1)-C(1)    | 1.26(2)   |
| O(2)-C(1)    | 1.22(2)   |
| O(3)-C(4)    | 1.25(2)   |
| O(4)-C(4)    | 1.21(2)   |
| O(5)-C(10)   | 1.24(2)   |
| O(6)-C(10)   | 1.27(2)   |
| O(7)-C(5)    | 1.24(2)   |
| O(8)-C(5)    | 1.23(2)   |
| O(9)-C(12)   | 1.24(2)   |
| O(10)-C(12)  | 1.28(2)   |
| O(11)-C(11)  | 1.28(2)   |
| O(12)-C(11)  | 1.27(2)   |
| O(13)-C(13)  | 1.22(2)   |
| O(14)-C(13)  | 1.26(2)   |
| O(15)-C(16)  | 1.24(2)   |
| O(16)-C(16)  | 1.23(2)   |
| O(17)-C(17)  | 1.34(2)   |
| O(18)-C(17)  | 1.25(2)   |
| O(19)-C(24)  | 1.28(2)   |
| O(20)-C(24)  | 1.217(19) |
| O(21)-C(23)  | 1.24(2)   |
| O(22)-C(23)  | 1.21(2)   |
| O(23)-C(22)  | 1.27(2)   |
| O(24)-C(22)  | 1.33(2)   |
| N(1)-C(2)    | 1.36(2)   |
| N(1)-C(3)#3  | 1.38(2)   |
| O(1W)-H(1WB) | 0.974(6)  |
| O(1W)-H(1WA) | 0.979(6)  |
| N(2)-C(15)   | 1.32(2)   |
| N(2)-C(14)   | 1.23(2)   |
| O(2W)-H(2WB) | 0.959(13) |
| O(2W)-H(2WA) | 0.976(7)  |
| N(3)-C(20)   | 1.33(2)   |
| N(3)-C(19)   | 1.32(2)   |
| O(3W)-H(3WB) | 0.975(6)  |



|               |          |
|---------------|----------|
| O(3W)-H(3WA)  | 0.975(6) |
| N(4)-C(21)    | 1.37(2)  |
| N(4)-C(18)    | 1.37(2)  |
| O(4W)-H(4WA)  | 0.975(8) |
| O(4W)-H(4WB)  | 0.975(6) |
| N(5)-C(9)     | 1.44(2)  |
| N(5)-C(6)     | 1.35(2)  |
| O(5W)-H(5WB)  | 0.987(6) |
| O(5W)-H(5WA)  | 0.976(7) |
| N(6)-C(8)     | 1.33(2)  |
| N(6)-C(7)     | 1.32(2)  |
| O(6W)-H(6WB)  | 0.975(8) |
| O(6W)-H(6WA)  | 0.978(7) |
| O(7W)-H(7WA)  | 0.981(7) |
| O(7W)-H(7WB)  | 0.979(6) |
| O(8W)-H(8WB)  | 0.975(7) |
| O(8W)-H(8WA)  | 0.976(6) |
| O(9W)-H(9WB)  | 0.988(7) |
| O(9W)-H(9WA)  | 0.986(8) |
| O(20W)-H(20A) | 0.8500   |
| O(20W)-H(20B) | 0.8500   |
| O(21W)-H(21B) | 0.8500   |
| O(21W)-H(21A) | 0.8500   |
| C(1)-C(2)     | 1.54(2)  |
| C(2)-C(3)     | 1.39(2)  |
| C(3)-C(4)     | 1.52(3)  |
| C(5)-C(6)     | 1.54(2)  |
| C(6)-C(7)     | 1.38(2)  |
| C(7)-C(11)    | 1.55(2)  |
| C(8)-C(12)    | 1.50(2)  |
| C(8)-C(9)     | 1.35(2)  |
| C(9)-C(10)    | 1.51(3)  |
| C(13)-C(14)   | 1.56(3)  |
| C(14)-C(15)#4 | 1.45(2)  |
| C(15)-C(16)   | 1.53(3)  |
| C(17)-C(18)   | 1.54(3)  |

|                    |           |
|--------------------|-----------|
| C(18)-C(19)        | 1.39(2)   |
| C(19)-C(24)        | 1.56(2)   |
| C(20)-C(21)        | 1.34(2)   |
| C(20)-C(23)        | 1.52(2)   |
| C(21)-C(22)        | 1.49(3)   |
| O(10W)-H(10A)      | 0.984(9)  |
| O(10W)-H(10B)      | 0.988(10) |
| O(14W)-H(14W)      | 0.8500    |
| O(15W)-H(15A)      | 0.8500    |
| O(15W)-H(15B)      | 0.8500    |
| O(16W)-H(16A)      | 0.8400    |
| O(16W)-H(16B)      | 0.8500    |
| O(17W)-H(17A)      | 0.8400    |
| O(17W)-H(17B)      | 0.8500    |
| O(18W)-H(18A)      | 0.8500    |
| O(18W)-H(18B)      | 0.8500    |
| O(19W)-H(19A)      | 0.8500    |
| O(19W)-H(19B)      | 0.8500    |
| O(1)-Tb(1)-O(5)    | 81.1(4)   |
| O(1)-Tb(1)-O(7)    | 79.5(4)   |
| O(1)-Tb(1)-N(1)    | 62.9(4)   |
| O(1)-Tb(1)-N(5)    | 73.6(4)   |
| O(1)-Tb(1)-O(9)#1  | 80.7(4)   |
| O(1)-Tb(1)-O(10)#1 | 131.5(4)  |
| O(1)-Tb(1)-O(11)#2 | 144.4(4)  |
| O(1)-Tb(1)-O(4)#3  | 123.0(4)  |
| O(5)-Tb(1)-O(7)    | 127.7(4)  |
| O(5)-Tb(1)-N(1)    | 80.3(4)   |
| O(5)-Tb(1)-N(5)    | 64.9(4)   |
| O(5)-Tb(1)-O(9)#1  | 148.8(4)  |
| O(5)-Tb(1)-O(10)#1 | 146.5(4)  |
| O(5)-Tb(1)-O(11)#2 | 80.4(4)   |
| O(4)#3-Tb(1)-O(5)  | 81.9(4)   |
| O(7)-Tb(1)-N(1)    | 129.4(4)  |
| O(7)-Tb(1)-N(5)    | 63.1(4)   |

|                       |            |
|-----------------------|------------|
| O(7)-Tb(1)-O(9)#1     | 72.9(4)    |
| O(7)-Tb(1)-O(10)#1    | 74.4(3)    |
| O(7)-Tb(1)-O(11)#2    | 88.3(4)    |
| O(4)#3-Tb(1)-O(7)     | 147.6(4)   |
| N(1)-Tb(1)-N(5)       | 127.7(4)   |
| O(9)#1-Tb(1)-N(1)     | 68.8(4)    |
| O(10)#1-Tb(1)-N(1)    | 105.5(4)   |
| O(11)#2-Tb(1)-N(1)    | 141.7(4)   |
| O(4)#3-Tb(1)-N(1)     | 60.7(4)    |
| O(9)#1-Tb(1)-N(5)     | 132.1(5)   |
| O(10)#1-Tb(1)-N(5)    | 125.2(4)   |
| O(11)#2-Tb(1)-N(5)    | 71.0(4)    |
| O(4)#3-Tb(1)-N(5)     | 140.9(5)   |
| O(9)#1-Tb(1)-O(10)#1  | 52.9(4)    |
| O(9)#1-Tb(1)-O(11)#2  | 127.4(4)   |
| O(4)#3-Tb(1)-O(9)#1   | 87.1(4)    |
| O(10)#1-Tb(1)-O(11)#2 | 75.0(4)    |
| O(4)#3-Tb(1)-O(10)#1  | 73.2(4)    |
| O(4)#3-Tb(1)-O(11)#2  | 84.0(4)    |
| O(1W)-Tb(2)-O(2)      | 77.5(3)    |
| O(1W)-Tb(2)-O(2W)     | 99.7(2)    |
| O(1W)-Tb(2)-O(3)      | 145.2(3)   |
| O(1W)-Tb(2)-O(3W)     | 87.87(15)  |
| O(1W)-Tb(2)-O(4W)     | 140.09(14) |
| O(1W)-Tb(2)-O(13)     | 78.6(3)    |
| O(1W)-Tb(2)-O(16)#4   | 70.3(3)    |
| O(2)-Tb(2)-O(2W)      | 72.1(4)    |
| O(2)-Tb(2)-O(3)       | 69.4(4)    |
| O(2)-Tb(2)-O(3W)      | 78.2(3)    |
| O(2)-Tb(2)-O(4W)      | 139.4(3)   |
| O(2)-Tb(2)-O(13)      | 143.6(4)   |
| O(2)-Tb(2)-O(16)#4    | 126.0(4)   |
| O(2W)-Tb(2)-O(3)      | 80.3(3)    |
| O(2W)-Tb(2)-O(3W)     | 146.8(3)   |
| O(2W)-Tb(2)-O(4W)     | 84.0(3)    |
| O(2W)-Tb(2)-O(13)     | 139.4(4)   |

|                     |            |
|---------------------|------------|
| O(2W)-Tb(2)-O(16)#4 | 72.1(4)    |
| O(3)-Tb(2)-O(3W)    | 75.5(3)    |
| O(3)-Tb(2)-O(4W)    | 74.7(3)    |
| O(3)-Tb(2)-O(13)    | 123.6(4)   |
| O(3)-Tb(2)-O(16)#4  | 139.4(4)   |
| O(3W)-Tb(2)-O(4W)   | 110.67(16) |
| O(3W)-Tb(2)-O(13)   | 73.8(3)    |
| O(3W)-Tb(2)-O(16)#4 | 139.8(3)   |
| O(4W)-Tb(2)-O(13)   | 73.7(3)    |
| O(4W)-Tb(2)-O(16)#4 | 73.3(3)    |
| O(13)-Tb(2)-O(16)#4 | 69.2(4)    |
| O(9W)-Tb(3)-O(19)   | 86.9(3)    |
| O(9W)-Tb(3)-O(21)   | 80.6(3)    |
| O(9W)-Tb(3)-N(3)    | 73.9(3)    |
| O(9W)-Tb(3)-O(14)#5 | 149.2(3)   |
| O(9W)-Tb(3)-O(15)#5 | 82.1(3)    |
| O(9W)-Tb(3)-O(23)#5 | 73.1(3)    |
| O(9W)-Tb(3)-O(24)#5 | 126.3(3)   |
| O(9W)-Tb(3)-N(2)#5  | 142.4(3)   |
| O(19)-Tb(3)-O(21)   | 126.5(4)   |
| O(19)-Tb(3)-N(3)    | 63.2(4)    |
| O(14)#5-Tb(3)-O(19) | 82.4(4)    |
| O(15)#5-Tb(3)-O(19) | 150.0(4)   |
| O(19)-Tb(3)-O(23)#5 | 77.2(4)    |
| O(19)-Tb(3)-O(24)#5 | 72.8(4)    |
| O(19)-Tb(3)-N(2)#5  | 129.1(4)   |
| O(21)-Tb(3)-N(3)    | 63.3(4)    |
| O(14)#5-Tb(3)-O(21) | 82.7(4)    |
| O(15)#5-Tb(3)-O(21) | 79.1(4)    |
| O(21)-Tb(3)-O(23)#5 | 143.7(4)   |
| O(21)-Tb(3)-O(24)#5 | 150.3(4)   |
| O(21)-Tb(3)-N(2)#5  | 84.1(4)    |
| O(14)#5-Tb(3)-N(3)  | 75.5(4)    |
| O(15)#5-Tb(3)-N(3)  | 137.9(4)   |
| O(23)#5-Tb(3)-N(3)  | 128.9(4)   |
| O(24)#5-Tb(3)-N(3)  | 130.7(4)   |

|                       |            |
|-----------------------|------------|
| N(2)#5-Tb(3)-N(3)     | 127.8(4)   |
| O(14)#5-Tb(3)-O(15)#5 | 119.8(4)   |
| O(14)#5-Tb(3)-O(23)#5 | 131.4(3)   |
| O(14)#5-Tb(3)-O(24)#5 | 77.7(4)    |
| O(14)#5-Tb(3)-N(2)#5  | 60.1(4)    |
| O(15)#5-Tb(3)-O(23)#5 | 73.0(4)    |
| O(15)#5-Tb(3)-O(24)#5 | 91.5(4)    |
| O(15)#5-Tb(3)-N(2)#5  | 61.3(4)    |
| O(23)#5-Tb(3)-O(24)#5 | 54.3(4)    |
| O(23)#5-Tb(3)-N(2)#5  | 101.8(4)   |
| O(24)#5-Tb(3)-N(2)#5  | 66.9(4)    |
| O(5W)-Tb(4)-O(6W)     | 65.24(16)  |
| O(5W)-Tb(4)-O(7W)     | 72.98(14)  |
| O(5W)-Tb(4)-O(8W)     | 69.97(16)  |
| O(5W)-Tb(4)-O(17)     | 82.3(3)    |
| O(5W)-Tb(4)-O(20)     | 136.45(16) |
| O(5W)-Tb(4)-O(20W)    | 141.6(3)   |
| O(5W)-Tb(4)-O(21W)    | 132.9(4)   |
| O(5W)-Tb(4)-O(8)#5    | 84.5(3)    |
| O(6W)-Tb(4)-O(7W)     | 71.73(17)  |
| O(6W)-Tb(4)-O(8W)     | 119.03(15) |
| O(6W)-Tb(4)-O(17)     | 139.3(3)   |
| O(6W)-Tb(4)-O(20)     | 113.34(15) |
| O(6W)-Tb(4)-O(20W)    | 135.0(3)   |
| O(6W)-Tb(4)-O(21W)    | 67.9(4)    |
| O(6W)-Tb(4)-O(8)#5    | 65.8(3)    |
| O(7W)-Tb(4)-O(8W)     | 129.62(18) |
| O(7W)-Tb(4)-O(17)     | 76.0(3)    |
| O(7W)-Tb(4)-O(20)     | 66.29(16)  |
| O(7W)-Tb(4)-O(20W)    | 138.3(4)   |
| O(7W)-Tb(4)-O(21W)    | 97.0(4)    |
| O(7W)-Tb(4)-O(8)#5    | 137.2(3)   |
| O(8W)-Tb(4)-O(17)     | 66.4(3)    |
| O(8W)-Tb(4)-O(20)     | 127.62(16) |
| O(8W)-Tb(4)-O(20W)    | 71.8(3)    |
| O(8W)-Tb(4)-O(21W)    | 133.3(4)   |

|                     |           |
|---------------------|-----------|
| O(8)#5-Tb(4)-O(8W)  | 70.9(3)   |
| O(17)-Tb(4)-O(20)   | 73.8(3)   |
| O(17)-Tb(4)-O(20W)  | 85.7(4)   |
| O(17)-Tb(4)-O(21W)  | 141.1(5)  |
| O(8)#5-Tb(4)-O(17)  | 137.2(4)  |
| O(20)-Tb(4)-O(20W)  | 72.7(4)   |
| O(20)-Tb(4)-O(21W)  | 68.6(4)   |
| O(8)#5-Tb(4)-O(20)  | 136.9(3)  |
| O(20W)-Tb(4)-O(21W) | 74.5(4)   |
| O(8)#5-Tb(4)-O(20W) | 80.0(4)   |
| O(8)#5-Tb(4)-O(21W) | 72.3(4)   |
| Tb(1)-O(1)-C(1)     | 128.0(11) |
| Tb(2)-O(2)-C(1)     | 139.6(11) |
| Tb(2)-O(3)-C(4)     | 157.6(12) |
| Tb(1)#3-O(4)-C(4)   | 131.8(12) |
| Tb(1)-O(5)-C(10)    | 125.5(11) |
| Tb(1)-O(7)-C(5)     | 124.7(10) |
| Tb(4)#1-O(8)-C(5)   | 144.8(11) |
| Tb(1)#5-O(9)-C(12)  | 95.8(10)  |
| Tb(1)#5-O(10)-C(12) | 88.6(9)   |
| Tb(1)#2-O(11)-C(11) | 133.6(10) |
| Tb(2)-O(13)-C(13)   | 141.3(11) |
| Tb(3)#1-O(14)-C(13) | 130.4(10) |
| Tb(3)#1-O(15)-C(16) | 130.7(11) |
| Tb(2)#4-O(16)-C(16) | 148.8(11) |
| Tb(4)-O(17)-C(17)   | 130.4(11) |
| Tb(3)-O(19)-C(24)   | 129.6(11) |
| Tb(4)-O(20)-C(24)   | 136.2(9)  |
| Tb(3)-O(21)-C(23)   | 128.2(11) |
| Tb(3)#1-O(23)-C(22) | 92.4(10)  |
| Tb(3)#1-O(24)-C(22) | 90.8(10)  |
| Tb(1)-N(1)-C(2)     | 119.1(11) |
| Tb(1)-N(1)-C(3)#3   | 120.8(11) |
| C(2)-N(1)-C(3)#3    | 118.5(14) |
| H(1WA)-O(1W)-H(1WB) | 104.9(9)  |
| Tb(2)-O(1W)-H(1WA)  | 132.4(7)  |

|                     |           |
|---------------------|-----------|
| Tb(2)-O(1W)-H(1WB)  | 120.8(7)  |
| Tb(3)#1-N(2)-C(14)  | 116.4(11) |
| C(14)-N(2)-C(15)    | 125.0(16) |
| Tb(3)#1-N(2)-C(15)  | 113.2(11) |
| H(2WA)-O(2W)-H(2WB) | 106.2(11) |
| Tb(2)-O(2W)-H(2WA)  | 120.5(9)  |
| Tb(2)-O(2W)-H(2WB)  | 129.0(11) |
| Tb(3)-N(3)-C(20)    | 119.9(11) |
| Tb(3)-N(3)-C(19)    | 121.2(11) |
| C(19)-N(3)-C(20)    | 119.0(15) |
| Tb(2)-O(3W)-H(3WA)  | 126.8(5)  |
| Tb(2)-O(3W)-H(3WB)  | 123.8(8)  |
| H(3WA)-O(3W)-H(3WB) | 105.1(9)  |
| C(18)-N(4)-C(21)    | 113.6(15) |
| Tb(2)-O(4W)-H(4WB)  | 123.5(11) |
| H(4WA)-O(4W)-H(4WB) | 105.1(9)  |
| Tb(2)-O(4W)-H(4WA)  | 115.7(5)  |
| Tb(1)-N(5)-C(6)     | 121.5(11) |
| C(6)-N(5)-C(9)      | 119.3(14) |
| Tb(1)-N(5)-C(9)     | 118.7(11) |
| Tb(4)-O(5W)-H(5WB)  | 122.8(4)  |
| H(5WA)-O(5W)-H(5WB) | 103.8(7)  |
| Tb(4)-O(5W)-H(5WA)  | 116.2(6)  |
| C(7)-N(6)-C(8)      | 115.6(15) |
| Tb(4)-O(6W)-H(6WB)  | 113.2(5)  |
| H(6WA)-O(6W)-H(6WB) | 105.0(8)  |
| Tb(4)-O(6W)-H(6WA)  | 123.6(8)  |
| H(7WA)-O(7W)-H(7WB) | 104.4(10) |
| Tb(4)-O(7W)-H(7WA)  | 133.4(6)  |
| Tb(4)-O(7W)-H(7WB)  | 115.4(6)  |
| H(8WA)-O(8W)-H(8WB) | 105.1(8)  |
| Tb(4)-O(8W)-H(8WB)  | 115.6(6)  |
| Tb(4)-O(8W)-H(8WA)  | 99.8(5)   |
| Tb(3)-O(9W)-H(9WA)  | 135.1(6)  |
| Tb(3)-O(9W)-H(9WB)  | 121.2(4)  |
| H(9WA)-O(9W)-H(9WB) | 103.6(8)  |

|                      |           |
|----------------------|-----------|
| Tb(4)-O(20W)-H(20A)  | 109.00    |
| Tb(4)-O(20W)-H(20B)  | 109.00    |
| H(20A)-O(20W)-H(20B) | 110.00    |
| Tb(4)-O(21W)-H(21A)  | 144.00    |
| H(21A)-O(21W)-H(21B) | 110.00    |
| Tb(4)-O(21W)-H(21B)  | 95.00     |
| O(1)-C(1)-C(2)       | 114.4(15) |
| O(1)-C(1)-O(2)       | 124.3(16) |
| O(2)-C(1)-C(2)       | 121.3(15) |
| N(1)-C(2)-C(3)       | 122.6(16) |
| C(1)-C(2)-C(3)       | 126.5(16) |
| N(1)-C(2)-C(1)       | 110.9(14) |
| N(1)#3-C(3)-C(4)     | 108.4(14) |
| C(2)-C(3)-C(4)       | 132.8(16) |
| N(1)#3-C(3)-C(2)     | 118.7(16) |
| O(3)-C(4)-C(3)       | 119.5(15) |
| O(4)-C(4)-C(3)       | 115.9(16) |
| O(3)-C(4)-O(4)       | 124.5(17) |
| O(7)-C(5)-C(6)       | 116.8(15) |
| O(8)-C(5)-C(6)       | 114.7(15) |
| O(7)-C(5)-O(8)       | 128.5(16) |
| N(5)-C(6)-C(7)       | 116.9(16) |
| C(5)-C(6)-C(7)       | 130.5(16) |
| N(5)-C(6)-C(5)       | 112.4(14) |
| N(6)-C(7)-C(11)      | 111.7(14) |
| C(6)-C(7)-C(11)      | 122.1(15) |
| N(6)-C(7)-C(6)       | 126.2(16) |
| N(6)-C(8)-C(9)       | 125.0(16) |
| C(9)-C(8)-C(12)      | 120.6(16) |
| N(6)-C(8)-C(12)      | 114.2(15) |
| N(5)-C(9)-C(8)       | 116.8(16) |
| C(8)-C(9)-C(10)      | 133.6(16) |
| N(5)-C(9)-C(10)      | 109.6(14) |
| O(5)-C(10)-C(9)      | 120.5(16) |
| O(6)-C(10)-C(9)      | 110.2(14) |
| O(5)-C(10)-O(6)      | 128.4(17) |



|                     |           |
|---------------------|-----------|
| O(11)-C(11)-C(7)    | 112.9(15) |
| O(12)-C(11)-C(7)    | 118.6(14) |
| O(11)-C(11)-O(12)   | 128.5(15) |
| O(9)-C(12)-C(8)     | 119.4(16) |
| O(10)-C(12)-C(8)    | 118.6(15) |
| O(9)-C(12)-O(10)    | 122.0(16) |
| O(13)-C(13)-O(14)   | 125.1(16) |
| O(14)-C(13)-C(14)   | 111.4(15) |
| O(13)-C(13)-C(14)   | 123.4(16) |
| N(2)-C(14)-C(13)    | 116.0(15) |
| C(13)-C(14)-C(15)#4 | 123.8(15) |
| N(2)-C(14)-C(15)#4  | 119.5(16) |
| C(14)#4-C(15)-C(16) | 129.4(16) |
| N(2)-C(15)-C(16)    | 114.6(14) |
| N(2)-C(15)-C(14)#4  | 115.0(16) |
| O(15)-C(16)-C(15)   | 113.5(15) |
| O(15)-C(16)-O(16)   | 127.2(17) |
| O(16)-C(16)-C(15)   | 119.2(15) |
| O(17)-C(17)-C(18)   | 119.3(15) |
| O(17)-C(17)-O(18)   | 121.3(17) |
| O(18)-C(17)-C(18)   | 118.0(17) |
| N(4)-C(18)-C(19)    | 122.3(17) |
| C(17)-C(18)-C(19)   | 128.2(16) |
| N(4)-C(18)-C(17)    | 109.5(15) |
| C(18)-C(19)-C(24)   | 124.6(16) |
| N(3)-C(19)-C(18)    | 120.3(16) |
| N(3)-C(19)-C(24)    | 115.0(15) |
| C(21)-C(20)-C(23)   | 125.0(16) |
| N(3)-C(20)-C(23)    | 114.1(15) |
| N(3)-C(20)-C(21)    | 120.9(16) |
| N(4)-C(21)-C(22)    | 112.2(15) |
| N(4)-C(21)-C(20)    | 123.7(16) |
| C(20)-C(21)-C(22)   | 124.1(17) |
| O(23)-C(22)-C(21)   | 124.6(16) |
| O(23)-C(22)-O(24)   | 122.0(15) |
| O(24)-C(22)-C(21)   | 113.2(16) |

|                      |           |
|----------------------|-----------|
| O(21)-C(23)-C(20)    | 114.4(15) |
| O(22)-C(23)-C(20)    | 118.4(15) |
| O(21)-C(23)-O(22)    | 127.1(16) |
| O(20)-C(24)-C(19)    | 121.9(14) |
| O(19)-C(24)-O(20)    | 126.9(15) |
| O(19)-C(24)-C(19)    | 110.9(14) |
| H(10A)-O(10W)-H(10B) | 103.5(11) |
| H(15A)-O(15W)-H(15B) | 110.00    |
| H(16A)-O(16W)-H(16B) | 109.00    |
| H(17A)-O(17W)-H(17B) | 109.00    |
| H(18A)-O(18W)-H(18B) | 110.00    |
| H(19A)-O(19W)-H(19B) | 110.00    |

---

Symmetry transformations used to generate equivalent atoms:

#1  $x+1,y,z$  #2  $-x+2,-y+2,-z$  #3  $-x+3,-y+1,-z$

#4  $-x+2,-y+1,-z+1$  #5  $x-1,y,z$

Table S11. Anisotropic displacement parameters ( $\text{\AA}^2 \times 10^3$ ) for **2**. The anisotropic displacement factor exponent takes the form:  $-2\pi^2 [ h^2 a^{*2} U^{11} + \dots + 2 h k a^* b^* U^{12} ]$

|       | U <sup>11</sup> | U <sup>22</sup> | U <sup>33</sup> | U <sup>23</sup> | U <sup>13</sup> | U <sup>12</sup> |
|-------|-----------------|-----------------|-----------------|-----------------|-----------------|-----------------|
| Tb(1) | 7(1)            | 14(1)           | 6(1)            | 0(1)            | 0(1)            | -1(1)           |
| Tb(2) | 19(1)           | 14(1)           | 6(1)            | 1(1)            | 3(1)            | -4(1)           |
| Tb(3) | 8(1)            | 16(1)           | 7(1)            | 1(1)            | -2(1)           | -4(1)           |
| Tb(4) | 18(1)           | 20(1)           | 17(1)           | 1(1)            | -3(1)           | -5(1)           |
| O(1)  | 8(2)            | 10(1)           | 9(2)            | 1(1)            | -2(2)           | -3(1)           |
| O(1W) | 20(4)           | 18(4)           | 19(4)           | 7(4)            | -3(4)           | 6(3)            |
| O(2)  | 10(2)           | 9(1)            | 8(1)            | 0(1)            | -2(1)           | -3(1)           |
| O(2W) | 36(5)           | 37(5)           | 21(5)           | -6(5)           | 0(5)            | -15(4)          |
| O(3)  | 16(2)           | 14(2)           | 10(1)           | 1(1)            | 0(1)            | 1(2)            |
| O(3W) | 26(5)           | 32(5)           | 20(5)           | -6(5)           | 1(5)            | -18(4)          |
| O(4)  | 10(2)           | 11(1)           | 11(2)           | 1(1)            | -1(1)           | -3(1)           |
| O(4W) | 49(6)           | 50(6)           | 39(6)           | -6(5)           | -3(5)           | 2(5)            |
| O(5)  | 15(1)           | 16(2)           | 15(2)           | -1(1)           | -1(1)           | -3(1)           |
| O(5W) | 33(5)           | 31(5)           | 27(6)           | -1(5)           | 0(5)            | -1(4)           |
| O(6)  | 17(1)           | 20(1)           | 18(1)           | -2(1)           | -2(1)           | -4(1)           |
| O(6W) | 31(5)           | 28(5)           | 30(6)           | -5(5)           | 0(5)            | 1(4)            |
| O(7)  | 12(1)           | 11(1)           | 12(1)           | 0(1)            | -1(1)           | -3(1)           |
| O(7W) | 22(5)           | 16(5)           | 14(5)           | 5(4)            | 2(4)            | -2(4)           |
| O(8)  | 14(1)           | 14(1)           | 14(1)           | -1(1)           | -1(1)           | -2(1)           |
| O(8W) | 18(5)           | 24(5)           | 25(5)           | -8(4)           | 4(4)            | -8(4)           |
| O(9)  | 12(1)           | 12(1)           | 12(1)           | -1(1)           | -1(1)           | -2(1)           |
| O(9W) | 21(5)           | 18(5)           | 24(5)           | 7(4)            | -4(5)           | -3(4)           |
| O(10) | 12(1)           | 12(1)           | 12(1)           | -1(1)           | 0(1)            | -1(1)           |
| O(11) | 12(1)           | 12(1)           | 12(1)           | 0(1)            | -1(1)           | -2(1)           |
| O(12) | 15(1)           | 15(2)           | 14(1)           | -1(1)           | 0(1)            | -3(1)           |
| O(13) | 16(2)           | 17(2)           | 15(1)           | -1(1)           | 3(1)            | -5(1)           |
| O(14) | 16(2)           | 14(1)           | 12(2)           | 2(1)            | 0(2)            | -4(1)           |
| O(15) | 10(2)           | 10(1)           | 10(2)           | 1(1)            | 0(2)            | -3(1)           |
| O(16) | 21(3)           | 13(2)           | 11(1)           | 1(1)            | -1(1)           | -9(1)           |
| O(17) | 23(2)           | 21(2)           | 21(1)           | 0(1)            | -4(1)           | -2(2)           |
| O(18) | 20(2)           | 19(1)           | 19(2)           | 0(1)            | -1(1)           | -6(1)           |

|        |       |       |       |       |        |       |
|--------|-------|-------|-------|-------|--------|-------|
| O(19)  | 13(1) | 14(1) | 11(2) | 0(1)  | -2(1)  | -3(1) |
| O(20)  | 13(2) | 15(1) | 13(1) | 0(1)  | 0(1)   | -2(1) |
| O(20W) | 24(5) | 26(5) | 25(5) | -7(5) | -2(5)  | -1(4) |
| O(21)  | 14(1) | 19(2) | 16(3) | 3(2)  | -3(1)  | -4(1) |
| O(21W) | 39(6) | 37(6) | 25(6) | -1(5) | -11(5) | 6(4)  |
| O(22)  | 13(1) | 16(2) | 16(2) | 2(2)  | -2(1)  | -4(1) |
| O(23)  | 16(2) | 22(2) | 18(1) | -2(1) | -3(1)  | -4(1) |
| O(24)  | 16(2) | 17(1) | 14(2) | 2(1)  | -2(1)  | -2(1) |
| N(1)   | 10(3) | 11(2) | 9(1)  | 0(1)  | -1(1)  | -3(1) |
| N(2)   | 10(2) | 11(2) | 11(1) | 1(1)  | -1(1)  | -1(1) |
| N(3)   | 13(1) | 11(1) | 11(1) | -4(1) | -1(1)  | -2(1) |
| N(4)   | 14(1) | 17(1) | 18(1) | 2(1)  | -2(1)  | -4(1) |
| N(5)   | 13(1) | 13(1) | 14(1) | 0(1)  | -1(1)  | -2(1) |
| N(6)   | 12(1) | 12(1) | 12(1) | 1(1)  | -1(1)  | -2(1) |
| C(1)   | 10(1) | 10(1) | 9(1)  | 0(1)  | -2(1)  | -3(1) |
| C(2)   | 12(1) | 12(1) | 10(1) | 1(1)  | 0(1)   | -1(1) |
| C(3)   | 10(2) | 10(1) | 9(1)  | -1(1) | -2(1)  | -4(1) |
| C(4)   | 11(2) | 12(1) | 10(1) | 1(1)  | -1(1)  | -2(1) |
| C(5)   | 12(1) | 12(1) | 12(1) | 1(1)  | -1(1)  | -2(1) |
| C(6)   | 12(1) | 13(1) | 13(1) | 0(1)  | -1(1)  | -2(1) |
| C(7)   | 12(1) | 12(1) | 12(1) | 1(1)  | -1(1)  | -2(1) |
| C(8)   | 13(1) | 14(1) | 14(1) | 0(1)  | -1(1)  | -3(1) |
| C(9)   | 13(1) | 14(1) | 14(1) | 0(1)  | -1(1)  | -3(1) |
| C(10)  | 15(1) | 15(1) | 15(1) | -1(1) | -1(1)  | -2(1) |
| O(10W) | 34(5) | 38(5) | 32(6) | -4(5) | -3(5)  | -9(4) |
| C(11)  | 13(1) | 13(1) | 13(1) | 0(1)  | -1(1)  | -2(1) |
| C(12)  | 13(1) | 13(1) | 13(1) | 0(1)  | -1(1)  | -2(1) |
| C(13)  | 14(1) | 14(1) | 13(1) | 1(1)  | 1(1)   | -4(1) |
| C(14)  | 11(2) | 11(1) | 11(1) | 1(1)  | -1(1)  | -1(1) |
| C(15)  | 9(2)  | 10(1) | 11(1) | 1(1)  | -2(1)  | -1(1) |
| C(16)  | 8(2)  | 10(1) | 11(1) | 1(1)  | -1(1)  | -2(1) |
| C(17)  | 15(1) | 17(1) | 19(1) | 1(1)  | -2(1)  | -3(1) |
| C(18)  | 14(1) | 16(1) | 18(1) | 0(1)  | -2(1)  | -4(1) |
| C(19)  | 13(1) | 12(1) | 12(1) | -3(1) | -1(1)  | -2(1) |
| C(20)  | 13(1) | 12(1) | 12(1) | -2(1) | -1(1)  | -3(1) |
| C(21)  | 14(1) | 15(1) | 15(1) | 0(1)  | -1(1)  | -4(1) |

|        |       |       |       |        |        |        |
|--------|-------|-------|-------|--------|--------|--------|
| C(22)  | 14(1) | 17(1) | 16(1) | 1(1)   | -2(1)  | -4(1)  |
| C(23)  | 13(1) | 12(1) | 12(1) | -2(1)  | -1(1)  | -3(1)  |
| C(24)  | 13(1) | 13(1) | 12(1) | -1(1)  | -1(1)  | -3(1)  |
| O(11W) | 55(6) | 48(6) | 67(6) | -1(5)  | -10(5) | -20(5) |
| O(12W) | 27(5) | 19(5) | 17(5) | -9(4)  | -3(5)  | -5(4)  |
| O(13W) | 61(6) | 53(6) | 51(6) | 0(5)   | -5(5)  | -14(5) |
| O(14W) | 42(6) | 44(6) | 47(6) | -1(5)  | -5(5)  | -2(5)  |
| O(15W) | 24(5) | 29(5) | 21(5) | -3(5)  | 9(5)   | -4(4)  |
| O(16W) | 42(6) | 43(6) | 38(6) | -2(5)  | 7(5)   | -5(5)  |
| O(17W) | 64(6) | 64(6) | 64(6) | -5(5)  | -7(5)  | -10(5) |
| O(18W) | 63(6) | 61(6) | 59(6) | -10(5) | -5(5)  | -14(5) |
| O(19W) | 36(5) | 35(5) | 32(6) | 10(5)  | -3(5)  | -4(4)  |

---

Table S12. Hydrogen coordinates ( $\times 10^4$ ) and isotropic displacement parameters ( $\text{\AA}^2 \times 10^{-3}$ ) for **2**.

|        | x         | y        | z       | U(eq) |
|--------|-----------|----------|---------|-------|
| H(3WA) | 14202(12) | 6481(3)  | 2668(2) | 32    |
| H(9WA) | 2344(5)   | 9074(7)  | 6091(5) | 32    |
| H(9WB) | 514(3)    | 9271(4)  | 6083(4) | 32    |
| H(1WA) | 9301(5)   | 6253(8)  | 2975(2) | 30    |
| H(1WB) | 10219(13) | 6770(3)  | 2429(3) | 30    |
| H(2WA) | 10015(4)  | 3615(9)  | 2138(3) | 45    |
| H(2WB) | 11167(12) | 3538(15) | 1516(3) | 45    |
| H(3WB) | 14959(5)  | 5957(10) | 2038(2) | 37    |
| H(4WA) | 14544(6)  | 3088(6)  | 2817(3) | 70    |
| H(4WB) | 13926(12) | 3459(12) | 3511(2) | 70    |
| H(5WA) | 4293(6)   | 11261(6) | 1413(3) | 47    |
| H(5WB) | 2812(6)   | 12038(3) | 1463(3) | 47    |
| H(6WA) | -504(7)   | 11521(7) | 1594(2) | 45    |
| H(6WB) | -404(11)  | 12024(5) | 2257(2) | 45    |
| H(7WA) | 2540(8)   | 12318(3) | 3069(5) | 27    |
| H(7WB) | 1797(15)  | 11651(7) | 3577(2) | 27    |
| H(8WA) | 3774(6)   | 9356(6)  | 1312(2) | 33    |
| H(8WB) | 5130(5)   | 9865(4)  | 1535(5) | 33    |
| H(20A) | 2851      | 8415     | 2851    | 38    |
| H(20B) | 2466      | 8337     | 2203    | 38    |
| H(21A) | -1476     | 10158    | 2470    | 52    |
| H(21B) | -631      | 10263    | 3018    | 52    |
| H(10A) | 3835(6)   | 7010(7)  | 3609(3) | 51    |
| H(10B) | 5596(5)   | 7004(12) | 3379(7) | 51    |
| H(14W) | 6396      | 7618     | 1972    | 67    |
| H(15A) | 6329      | 6896     | 1216    | 38    |
| H(15B) | 7042      | 5950     | 1294    | 38    |
| H(16A) | 10982     | 7438     | 1528    | 62    |
| H(16B) | 9420      | 7533     | 1770    | 62    |
| H(17A) | 8415      | 4756     | 1240    | 96    |

|        |       |       |      |    |
|--------|-------|-------|------|----|
| H(17B) | 9770  | 4917  | 871  | 96 |
| H(18A) | -1980 | 13469 | 2400 | 90 |
| H(18B) | -1827 | 13021 | 3015 | 90 |
| H(19A) | 5774  | 11800 | 2909 | 52 |
| H(19B) | 5737  | 11938 | 2231 | 52 |

---

Table S13. Hydrogen bonds lengths [ $\text{\AA}$ ] and angles [ $^\circ$ ] for **2**.

| D-H...A                  | d(D-H)    | d(H...A)  | d(D...A)  | <(DHA)    |
|--------------------------|-----------|-----------|-----------|-----------|
| O(9W)-H(9WA)...O(18)#6   | 0.985(5)  | 1.862(10) | 2.802(11) | 158.4(8)  |
| O(1W)-H(1WA)...O(12W)#7  | 0.978(4)  | 1.784(10) | 2.762(10) | 178.3(7)  |
| O(1W)-H(1WB)...O(16W)    | 0.976(3)  | 1.714(12) | 2.658(12) | 161.9(8)  |
| O(2W)-H(2WA)...O(18W)#7  | 0.975(4)  | 1.862(18) | 2.791(17) | 158.3(10) |
| O(2W)-H(2WB)...O(6)#8    | 0.959(12) | 1.699(8)  | 2.627(12) | 161.7(12) |
| O(3W)-H(3WB)...O(15W)#1  | 0.975(4)  | 1.780(15) | 2.694(13) | 154.7(12) |
| O(4W)-H(4WA)...O(19W)#7  | 0.975(4)  | 1.701(11) | 2.641(12) | 160.8(9)  |
| O(4W)-H(4WB)...O(22)#4   | 0.975(4)  | 1.705(11) | 2.621(10) | 154.9(14) |
| O(5W)-H(5WA)...O(10)#9   | 0.977(4)  | 1.922(11) | 2.730(10) | 138.4(7)  |
| O(6W)-H(6WA)...O(11)#5   | 0.977(4)  | 1.833(11) | 2.805(11) | 172.7(9)  |
| O(6W)-H(6WB)...O(18W)    | 0.975(4)  | 1.690(13) | 2.627(13) | 160.0(9)  |
| O(8W)-H(8WB)...O(12)     | 0.975(5)  | 1.904(11) | 2.757(11) | 144.6(9)  |
| O(20W)-H(20A)...O(10W)   | 0.85      | 2.17      | 2.940(13) | 149.9     |
| O(21W)-H(21A)...O(12)#5  | 0.85      | 2.03      | 2.822(17) | 154.8     |
| O(21W)-H(21B)...O(20)    | 0.85      | 2.25      | 2.773(16) | 120.2     |
| O(15W)-H(15A)...O(9)     | 0.85      | 2.22      | 2.797(18) | 125.3     |
| O(15W)-H(15B)...O(17W)   | 0.85      | 1.90      | 2.75(2)   | 170.6     |
| O(10W)-H(10A)...O(14)#5  | 0.985(5)  | 1.855(9)  | 2.829(10) | 169.0(7)  |
| O(10W)-H(10B)...O(12W)#7 | 0.988(5)  | 1.874(9)  | 2.861(9)  | 177.3(16) |
| O(16W)-H(16A)...O(1)     | 0.84      | 1.93      | 2.761(17) | 167.4     |
| O(16W)-H(16B)...O(14W)   | 0.85      | 2.06      | 2.77(2)   | 139.8     |
| O(19W)-H(19A)...O(18)    | 0.85      | 1.97      | 2.809(19) | 172.4     |
| O(17W)-H(17A)...O(5)#8   | 0.85      | 2.70      | 2.84(2)   | 90.4      |
| O(18W)-H(18B)...O(15)#6  | 0.85      | 2.27      | 2.83(2)   | 123.6     |
| O(14W)-H(14W)...O(15W)   | 0.85      | 2.18      | 2.88(2)   | 139.8     |

Symmetry transformations used to generate equivalent atoms:

#1  $x+1, y, z$  #2  $-x+2, -y+2, -z$  #3  $-x+3, -y+1, -z$ #4  $-x+2, -y+1, -z+1$  #5  $x-1, y, z$  #6  $-x+1, -y+2, -z+1$ #7  $x+1, y-1, z$  #8  $-x+2, -y+1, -z$  #9  $-x+1, -y+2, -z$
